# Supplementary material
Source: PubMed Central journal article supplement (PMC8532199)
Supplement: blood_BLD2020009346_s2.pdf [file blood_BLD2020009346_s2.pdf]

## **Supplementary materials and methods:**

### **Fluorochrome-conjugated antibodies and flow cytometry**

For flow cytometry analysis, PBMCs and skin dissociated cells were stained with fluorochrome-labeled monoclonal anti-human antibodies to CD8 (clone 3B5, Invitrogen), CD3 (clone UCHT1), CD4 (clone RPA-T4), CD2 (clone TS1/8), CD26 (clone BA5b) (all from Biolegend), CD7 (clone M-T701, BD Biosciences), and surface TCRV $\beta$  epitopes with the IOTest Beta Mark kit (Beckman Coulter, Indianapolis, IN). Data acquisition was done on LSRII and Fortessa flow cytometers (BD Biosciences). Flowjo X 10.0.7r2 was used for analysis.

### **Validation of inferred copy number variations (CNVs) by whole exome sequencing and methylation microarray:**

Whole Exome Sequencing (WES) data from isolated malignant (CD4+TCRV $\beta$ 1+) and non-malignant cells (CD8+ T cells) as well as single-cell RNA-seq (3P-single-cell RNA-sequencing kit V2; 10X Genomics) from PBMCs of an SS patient not otherwise included in the study was used to validate the inferred CNV profiles. WES data was pre-processed according to the GATK Best Practice Workflow guidelines (<https://gatk.broadinstitute.org/hc/en-us/articles/360035535912-Data-pre-processing-for-variant-discovery>) and CNVs were detected using two established pipelines: GATK Somatic copy number variant discovery (<https://gatk.broadinstitute.org/hc/en-us/articles/360035535892-Somatic-copy-number-variant-discovery-CNVs->) and CNVkit<sup>1</sup> using default parameters. RNA expression from single cells were divided into malignant and non-malignant T cells based on overall expression patterns and distinct clustering. InferCNV was run with default parameters except for the cutoff which was set to 0.005 to include similar numbers of genes in the analysis as for the other samples in the study.

Copy number variation within malignant cells from the same SS patient was further verified by Infinium MethylationEPIC array (Illumina). CNV data was processed using the R packages ‘minfi’ and ‘conumee’ as described in the conumee vignette.

### **Validation of inferred CNVs using germline SNVs common between normal and malignant cells.**

To identify germline mutations, variant calling was performed using HaplotypeCaller of the GATK v3.7 suite on malignant and two non-malignant clusters. The definition of the clusters are as follows - 1) malignant cells: cells with the highest CDR3 sequence frequency for TCR  $\beta$ , 2) polyclonal cells: all CD3+CD4+ T cells that do not possess the malignant clonotype, 3) remaining cells: barcodes not belonging to cluster 1 or 2. Cell barcodes of the clusters were used to demultiplex the BAM file. BAM files were pre-processed and VCFs were generated according to the GATK Best Practice Workflow for RNA-seq (<https://gatk.broadinstitute.org/hc/en-us/articles/360035531192-RNAseq-short-variant-discovery-SNPs-Indels->). We then identified bi-allelic SNVs from the VCF, and excluded SNVs spanning the X and Y chromosome, as well as those found within all HLA genes. Only SNVs with a minimum read depth of 50 UMIs for each of the 3 clusters were included. To identify heterozygous genotypes, we use the UMI depth,  $N$ , and major allele frequency,  $k$ , and tested it against a heterozygous null model (defined as a Binomial distribution, parameterized with  $P_{\text{success}} = 0.5$ ). Heterozygous SNVs were selected if their variant allele frequency from both the polyclonal and remaining cell clusters did not reject the null hypothesis ( $P \geq 0.05$ ). Finally, p-values were generated for each heterozygous SNVs from allele frequencies in the malignant cluster by testing it against the same heterozygous null model. The significance threshold was set at  $p < 5.0 \times 10^{-8}$ .

### **Comparison of CNV profiles using copyKAT**

The InferCNV profile from CTCL patient SS1 was compared to results using copyKAT, an additional method of inferring CNV states from scRNA-seq data, as previously described.<sup>2</sup>

### **Additional phylogenetic methods**

From the copy number profiles derived from InferCNV HMM results, we constructed additional phylogenetic trees using Minimum Evolution and Average Linkage (UPGMA) with R package ape v5.3. Minimum evolution finds trees with the least amount of summed up branch lengths. ME's objective is similar to the maximum parsimony (MP) approach, but uses distances rather than sequences. Unlike neighbor-joining, UPGMA assumes constant mutation rates. For each tree, bootstrap analysis of a 100 replicates was performed each time. Visualization of the phylograms were constructed using R package ggtree v2.0.1.

### **Cell cycle analysis**

Cell cycle scoring of skin- and blood-derived malignant T cells was done as described on the Seurat cell-cycle scoring and regression vignette ([https://satijalab.org/seurat/archive/v3.0/cell\\_cycle\\_vignette.html](https://satijalab.org/seurat/archive/v3.0/cell_cycle_vignette.html)). This utilizes a list of canonical markers delineating G1, S and G2/M phases and is based on the scoring strategy described in Tirosh *et al.*, 2016.<sup>3</sup> Scores were superimposed on transcriptional trajectories using Monocle 2 v2.14<sup>4</sup> of malignant T cells from five CTCL patients.

## Supplementary tables:

| Volunteer ID | Sex | Age | Disease Stage at diagnosis (TNMB) | Disease Stage and burden at collection (TNMB) | SS or MF category                          | CD4/CD8 ratio | Phenotypically malignant cells out of all CD4+ T cells in blood | Clonal malignant TRAV and TRBV genes | Skin lesions                                        | Therapies 2 weeks prior to collection? | Past therapies for lymphoma                                                              | Symptoms history and disease onset                                                                                                                                    |
|--------------|-----|-----|-----------------------------------|-----------------------------------------------|--------------------------------------------|---------------|-----------------------------------------------------------------|--------------------------------------|-----------------------------------------------------|----------------------------------------|------------------------------------------------------------------------------------------|-----------------------------------------------------------------------------------------------------------------------------------------------------------------------|
| CTRL-1       | M   | 41  | N/A                               | N/A                                           | N/A                                        | 0.6:1         | N/A                                                             | N/A                                  | N/A                                                 | N/A                                    | N/A                                                                                      | N/A                                                                                                                                                                   |
| SS1          | F   | 49  | T4N3M1B2                          | T4N3M1B2                                      | SS, stage IVb                              | 5:1           | 60%                                                             | TRAV 3, TRBV 12-3                    | < 1% TBSA, patches (suspect invisible erythroderma) | No                                     | No previous therapies                                                                    | Developed rash 6 months before diagnosis. Tissue collected at diagnosis.                                                                                              |
| SS2          | M   | 62  | T4NxM0B2                          | T4NxM0B2                                      | SS, stage IVa1                             | 2:1           | 17%                                                             | TRAV 9-2, TRBV 5-4                   | Erythroderma                                        | No                                     | Topical-Clobetasol                                                                       | Developed erythroderma a year before diagnosis. Tissue collected 2 months after diagnosis.                                                                            |
| SS3          | F   | 71  | T4NxM0B2                          | T4NxM0B2                                      | SS, stage IVa1                             | -             | 21%                                                             | TRAV 22, TRBV 5-6                    | Plaques/rashes                                      | No                                     | No previous therapies                                                                    | Developed rash 1 year before diagnosis. Tissue collected 1 month after diagnosis.                                                                                     |
| SS4          | M   | 56  | T4N3M1B2                          | T4N3M1B2.                                     | SS, stage IVa2                             | 3:1           | 36%                                                             | TRAV 35, TRBV 3-1                    | Erythroderma                                        | No                                     | Topical-targretin, bexarotene fluocinolone, betamethasone                                | Developed itchy rash a year before diagnosis. Tissue collected at diagnosis                                                                                           |
| MFIV1        | F   | 39  | T2N0M0B0                          | T2N1M1B0                                      | MF, stage IVb (advanced from MF stage 1b)  | 1.1:1         | 35.8%                                                           | TRAV 35, TRBV 20-1                   | Plaques                                             | No                                     | Systemic-methotrexate, interferon, romidepsin                                            | Developed skin macules 3 years preceding MF stage 1b diagnosis. Advanced to MF stage IVB 2 years and 4 months after. Tissue collected 2 weeks after advancing.        |
| SS5          | F   | 71  | T2N0M0B0                          | T1aN0M0B2                                     | SS, stage IVa1 (advanced from MF stage 1b) | 9:1           | 60%                                                             | TRAV 1-1, TRBV 6-5                   | 85% TBSA, Erythroderma                              | Extracorporeal photophoresis           | Systemic-extracorporeal photophoresis, Topical-Taxotere, Adriamycin and Cyclophosphamide | Blanching erythematous rashes 6 months before MF stage 1b diagnosis. Advanced to SS during ECP treatment 4 years after. Tissue collected 1 year after advancing to SS |
| SS6          | M   | 78  | T4N3M0B1                          | T4N3M0B1                                      | SS, Stage IVa2                             | 4:1           | 46%                                                             | TRAV 8-4, TRBV 6-5                   | 100% TBSA, erythroderma                             | No                                     | No previous therapies for lymphoma                                                       | History of red, itchy rashes for over 15 years. Tissue collected 1 month after diagnosis.                                                                             |

**Supplementary Table 1. Clinical notes and data of CTCL patients and a healthy control.** TBSA: total body surface area.

Phenotypically malignant cells were defined as CD7- and CD26- CD4+ T cells or clonally expanded CD4+ T cells based on TCRvB staining that were also CD7- and CD26-.



| <i>Biospecimen ID</i> | <i>M</i> | <i>T4N</i> | <i>T8N</i> | <i>T4M</i> | <i>T8M</i> | <i>T8E</i> | <i>gdT</i> | <i>NK</i> | <i>BC</i> | <i>BCM</i> | <i>MO</i> | <i>DC</i> | <i>pDC</i> | <i>FB</i> | <i>KRT</i> | <i>UNC</i> |
|-----------------------|----------|------------|------------|------------|------------|------------|------------|-----------|-----------|------------|-----------|-----------|------------|-----------|------------|------------|
| <i>SS1 blood</i>      | 0.44     | 0.18       | 0.03       | 0.10       | 0.03       | 0.05       | 0.00       | 0.06      | 0.06      | 0.01       | 0.02      | 0.00      | 0.00       | 0.00      | 0.00       | 0.01       |
| <i>SS2 blood</i>      | 0.09     | 0.00       | 0.00       | 0.05       | 0.01       | 0.08       | 0.02       | 0.05      | 0.03      | 0.00       | 0.59      | 0.01      | 0.00       | 0.00      | 0.00       | 0.07       |
| <i>SS3 blood</i>      | 0.49     | 0.13       | 0.00       | 0.04       | 0.00       | 0.05       | 0.00       | 0.00      | 0.03      | 0.00       | 0.25      | 0.00      | 0.00       | 0.00      | 0.00       | 0.01       |
| <i>SS4 blood</i>      | 0.14     | 0.00       | 0.00       | 0.26       | 0.12       | 0.05       | 0.00       | 0.20      | 0.14      | 0.00       | 0.06      | 0.00      | 0.01       | 0.00      | 0.00       | 0.01       |
| <i>MFIV1 blood</i>    | 0.28     | 0.09       | 0.06       | 0.15       | 0.01       | 0.23       | 0.00       | 0.14      | 0.02      | 0.00       | 0.00      | 0.01      | 0.00       | 0.00      | 0.00       | 0.01       |
| <i>SS5 blood</i>      | 0.21     | 0.00       | 0.00       | 0.23       | 0.02       | 0.01       | 0.01       | 0.18      | 0.21      | 0.00       | 0.08      | 0.00      | 0.00       | 0.00      | 0.00       | 0.04       |
| <i>SS6 blood</i>      | 0.37     | 0.13       | 0.00       | 0.17       | 0.13       | 0.00       | 0.00       | 0.03      | 0.06      | 0.00       | 0.11      | 0.01      | 0.00       | 0.00      | 0.00       | 0.00       |
| <i>HCI blood</i>      | 0.00     | 0.08       | 0.14       | 0.14       | 0.14       | 0.08       | 0.03       | 0.05      | 0.07      | 0.02       | 0.21      | 0.03      | 0.01       | 0.00      | 0.00       | 0.02       |

**Supplementary Table 2. Fractions of PBMC populations making up the blood of CTCL patients.** **M:** Malignant T cells, **T4N:** Naïve CD4+ T cells, **T8N:** Naïve CD8+ T cells, **T4M:** Memory CD4+ T cells, **T8M:** Memory CD8+ T cells, **T8E:** Effector CD8+ T cells, **gdT:**  $\gamma/\delta$  T cells, **NK:** Natural killer cells, **BC:** B cells, **BCM:** Memory B cells, **MO:** Monocytes/macrophages, **DC:** Dendritic cells, **pDC:** plasmacytoid dendritic cells, **FB:** Fibroblasts, **KRT:** Keratinocytes, **UNC:** Unclassified. Apoptotic keratinocytes are filtered out.

| <i>Biospecimen ID</i> | <i>M</i> | <i>T4N</i> | <i>T8N</i> | <i>T4M</i> | <i>T8M</i> | <i>T8E</i> | <i>gdT</i> | <i>NK</i> | <i>BC</i> | <i>BCM</i> | <i>MO</i> | <i>DC</i> | <i>pDC</i> | <i>FB</i> | <i>KRT</i> | <i>UNC</i> |
|-----------------------|----------|------------|------------|------------|------------|------------|------------|-----------|-----------|------------|-----------|-----------|------------|-----------|------------|------------|
| <i>SS1 skin</i>       | 0.16     | 0.00       | 0.00       | 0.002      | 0.10       | 0.00       | 0.00       | 0.0       | 0.00      | 0.000      | 0.0       | 0.04      | 0.0000     | 0.0       | 0.59       | 0.00       |
|                       | 80       | 81         | 00         | 0          | 73         | 00         | 00         | 020       | 00        | 0          | 445       | 05        |            | 324       | 31         | 20         |
| <i>SS2 skin</i>       | 0.02     | 0.00       | 0.00       | 0.138      | 0.36       | 0.16       | 0.00       | 0.0       | 0.02      | 0.000      | 0.0       | 0.15      | 0.0040     | 0.0       | 0.00       | 0.01       |
|                       | 78       | 00         | 00         | 9          | 51         | 67         | 79         | 833       | 38        | 0          | 159       | 08        |            | 000       | 00         | 59         |
| <i>SS3 skin</i>       | 0.17     | 0.00       | 0.00       | 0.004      | 0.00       | 0.00       | 0.00       | 0.0       | 0.00      | 0.000      | 0.2       | 0.19      | 0.0000     | 0.1       | 0.20       | 0.00       |
|                       | 95       | 64         | 00         | 3          | 00         | 43         | 00         | 000       | 00        | 0          | 863       | 23        |            | 197       | 73         | 00         |
| <i>SS4 skin</i>       | 0.52     | 0.00       | 0.00       | 0.028      | 0.04       | 0.00       | 0.00       | 0.0       | 0.01      | 0.000      | 0.0       | 0.08      | 0.0000     | 0.0       | 0.23       | 0.00       |
|                       | 63       | 00         | 00         | 7          | 78         | 48         | 00         | 287       | 91        | 0          | 191       | 37        |            | 000       | 92         | 24         |
| <i>MFIV1 skin</i>     | 0.28     | 0.00       | 0.00       | 0.000      | 0.00       | 0.00       | 0.00       | 0.0       | 0.00      | 0.000      | 0.2       | 0.30      | 0.0000     | 0.1       | 0.06       | 0.00       |
|                       | 65       | 00         | 00         | 0          | 00         | 00         | 00         | 000       | 00        | 0          | 066       | 30        |            | 295       | 61         | 83         |
| <i>HCI skin</i>       | 0.00     | 0.00       | 0.02       | 0.040      | 0.02       | 0.04       | 0.00       | 0.0       | 0.00      | 0.040      | 0.0       | 0.14      | 0.0000     | 0.0       | 0.00       | 0.66       |
|                       | 00       | 00         | 00         | 0          | 00         | 00         | 00         | 400       | 00        | 0          | 000       | 00        |            | 000       | 00         | 00         |

**Supplementary Table 3. Fractions of tissue dissociated populations making up the skin of CTCL patients.** **M:** Malignant T cells, **T4N:** Naïve CD4+ T cells, **T8N:** Naïve CD8+ T cells, **T4M:** Memory CD4+ T cells, **T8M:** Memory CD8+ T cells, **T8E:** Effector CD8+ T cells, **gdT:**  $\gamma/\delta$  T cells, **NK:** Natural killer cells, **BC:** B cells, **BCM:** Memory B cells, **MO:** Monocytes/macrophages, **DC:** Dendritic cells, **pDC:** plasmacytoid dendritic cells, **FB:** Fibroblasts, **KRT:** Keratinocytes, **UNC:** Unclassified. Apoptotic keratinocytes are filtered out.

| Target                         | Clone                    | Barcode         | Concentration<br>(ug/ml) |
|--------------------------------|--------------------------|-----------------|--------------------------|
| CD3                            | UCHT1                    | TAGAACCGTATCCGT | 5                        |
| CD4                            | RPA-T4                   | TGTGGTAGCCCTTGT | 5                        |
| CD8                            | RPA-T8                   | TATCCCTGCCTTGCA | 5                        |
| TCRb                           | IP26                     | TAGCAGTCACTCCTA | 5                        |
| TCRg                           | B1                       | CTATCGTTTGATGCA | 5                        |
| CD44                           | BJ18                     | ATCTGTATGTCACAG | 0.5                      |
| CD62L                          | DREG-56                  | AACCGCGCTTCAGAT | 5                        |
| Ox40 (CD134)                   | Ber-<br>ACT35<br>(ACT35) | GCGATTCATGTCACG | 5                        |
| B7-H1 (PD-L1)                  | 29E.2A3                  | GTTGTCCGACAATAC | 5                        |
| EpCAM (CD326)                  | 9C4                      | AAACTCAGGTCCTTC | 5                        |
| CD66b                          | 6/40c                    | GCGAGAAATCTGCAT | 5                        |
| MHCII (HLA-DR)                 | L243                     | GCCTAGTTTGAACGC | 5                        |
| CD45                           | HI30                     | CGATTTGATCTGCCT | 0.5                      |
| CD19                           | HIB19                    | TCACGCAGTCCTCAA | 5                        |
| B220 (CD45R)                   | RA3-6B2                  | GTATAGACCAAAGCC | 5                        |
| CD11c                          | 3.9                      | CGTATGCCCTTTAGA | 5                        |
| CD14                           | M5E2                     | GCTTGGGCAATTAAG | 5                        |
| CD34                           | 581                      | TGGCTTAGCTTTACA | 5                        |
| CD56                           | 5.1H11                   | CGTATCTGTCATTAG | 5                        |
| CD16                           | B73.1                    | TATATCCCTCAACGC | 5                        |
| CD2                            | TS1/8                    | AATTCCGTCAGATGA | 1                        |
| CD5                            | UCHT2                    | ATTCCTCATTCCTGA | 5                        |
| CD45RA (Biolegend TotalSeq-C)* | HI100                    | TCAATCCTTCCGCTT | 1.25                     |
| CD45RO (Biolegend TotalSeq-C)* | UHL1                     | CTCCGAATCATGTTG | 1.25                     |
| CCR7                           | G043H7                   | ACTGCCATATCCCTA | 5                        |
| CD11b                          | ICRF44                   | CCATTCATTTGTGGC | 5                        |
| CD1a                           | HI149                    | CAACTTGGCCGAATC | 5                        |
| CD27                           | M-T271                   | ACGCAGTATTTCCGA | 5                        |
| CD69                           | FN50                     | CATTAGAGTCTGCCA | 5                        |
| PECAM (CD31)                   | WM59                     | CTCAGCCCTAGTATA | 5                        |
| CD138                          | DL-101                   | CTCGTTTGTAGCAAT | 5                        |
| CD24                           | ML5                      | GATTCCTTTACGAGC | 5                        |
| Siglec-8                       | 7C9                      | GAACCGTACCCATGA | 5                        |
| LAMP1                          | <u>H4A3</u>              | GAGAAATCAACCAAG | 5                        |
| C-kit (CD117)                  | 104D2                    | CTTACCTAGTCATTC | 5                        |
| IL7Ralpha (CD127)              | A019D5                   | TTGTTGTATCCGATC | 5                        |

|                                      |          |                 |       |
|--------------------------------------|----------|-----------------|-------|
| <b>CTLA4</b>                         | BNI3     | CAGAGCACCCATTAA | 5     |
| <b>HLA-A,B,C</b>                     | W6/32    | GGATGTACCGCGTAT | 5     |
| <b>CD77</b>                          | 5B5      | GTCATTGTATGTCTG | 5     |
| <b>CD366 (tim3)</b>                  | F38-2E2  | GGGCAATTAGCGAGT | 5     |
| <b>CD223 (lag3)</b>                  | 11C3C65  | GCCATTCCTGCCTAA | 5     |
| <b>CD28</b>                          | CD28.2   | GACAGTCGATGCAAC | 5     |
| <b>CD7</b>                           | CD7-6B7  | CTCCCTAGTTCCTTT | 5     |
| <b>CD26 (Adenosine)</b>              | BA5b     | TTCCTGCACGAGGAT | 5     |
| <b>PD-1 (CD279)</b>                  | NAT105   | GTTGGATGGTAGACT | 5     |
| <b>PD-L1 (CD274)</b>                 | MIH1     | GCAGTTGTCCGATTC | 5     |
| <b>IgG1</b>                          | MOPC-21  | GCGCAACTTGATGAT | 5     |
| <b>IgG2a</b>                         | MOPC-173 | TCCCTTGCGATTTAC | 5     |
| <b>CD123*</b>                        | 9F5      | TTAACCAGTTGTACC | 5     |
| <b>CD25*</b>                         | M-A251   | TGACCCTATTGAGAA | 5     |
| <b>B7-1*</b>                         | 2D10     | ACGAATCAATCTGTG | 5     |
| <b>B7-2 (CD86)*</b>                  | IT2.2    | GTCTTTGTCAGTGCA | 5     |
| <b>CD40*</b>                         | 5C3      | CTCAGATGGAGTATG | 5     |
| <b>CD40L*</b>                        | 24-31    | GCTAGATAGATGCAA | 5     |
| <b>CLA*</b>                          | HECA-452 | TCATCGTTTGTTCCT | 5     |
| <b>CD14 (Biolegend TotalSeq-C)**</b> | M5E2     | TCTCAGACCTCCGTA | 1     |
| <b>CD56 (Biolegend TotalSeq-C)**</b> | 5.1H11   | TCCTTTCCTGATAGG | 1     |
| <b>CD28 (Biolegend TotalSeq-C)**</b> | CD28.2   | TGAGAACGACCCTAA | 1.25  |
| <b>CD69 (Biolegend TotalSeq-C)**</b> | FN50     | GTCTCTTGGCTTAAA | 0.625 |

**Supplementary Table 4. Human ADT targets and barcodes.**

\*These antibodies were only used for SS2-SS6.

\*\*These Biolegend TotalSeq-C antibodies were only used for SS3 and SS4 instead of their “home-conjugated” counterparts.

Supplementary figures:

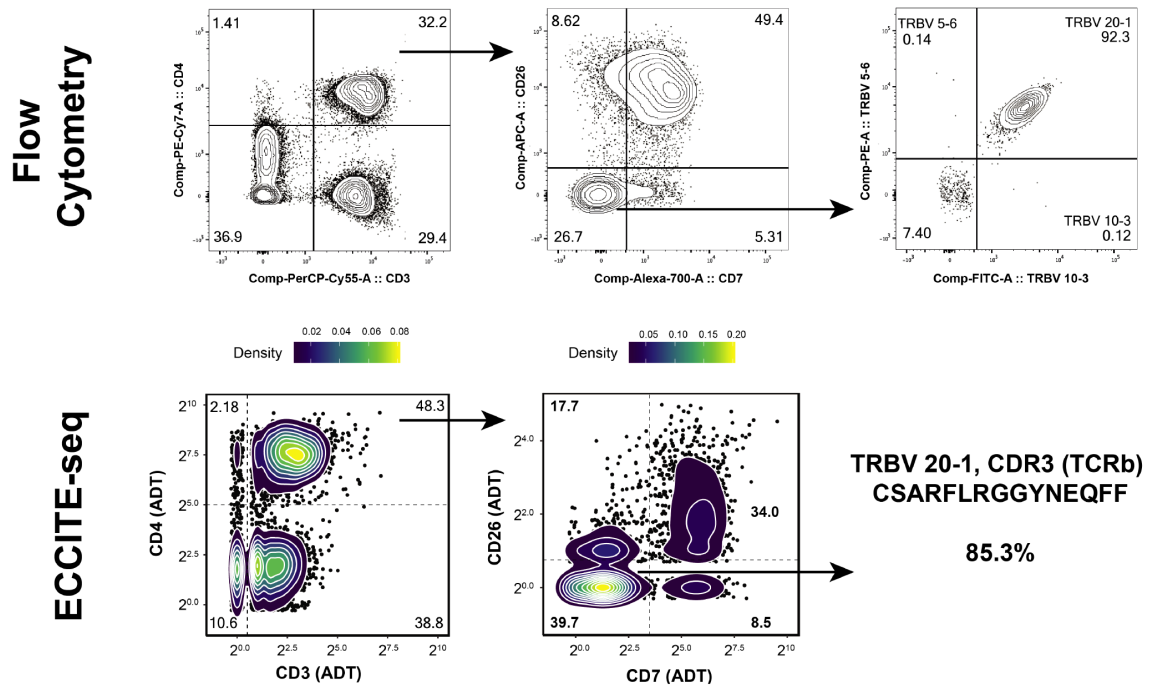

**Supplementary Figure 1. Analysis based on ADT counts recapitulates data from FACS analysis.** Digital rendering of ADT counts from patient MFIV1 for markers commonly used for flow cytometric analysis of patient blood (CD3, CD4, CD7, and CD26) largely recapitulates the distribution of cells within the gates/quadrants outlined in the FACS analysis of the same patient. Majority of the malignant clone (as evidenced by TCR clonotype revealed in ECCITE-seq analysis) falls into the Q4 quadrant with characteristic loss of CD26 and CD7.

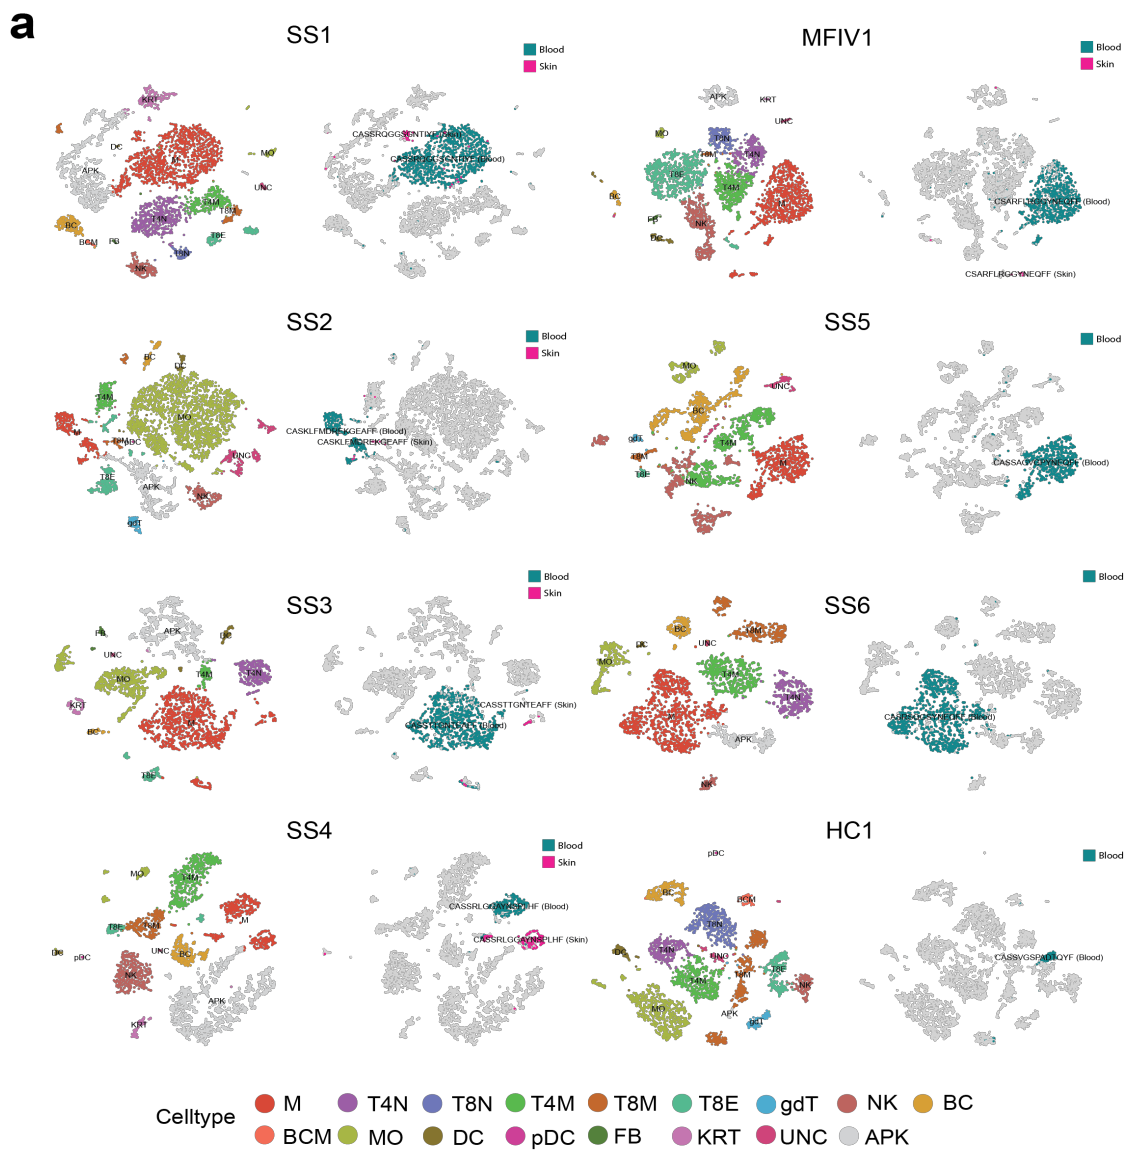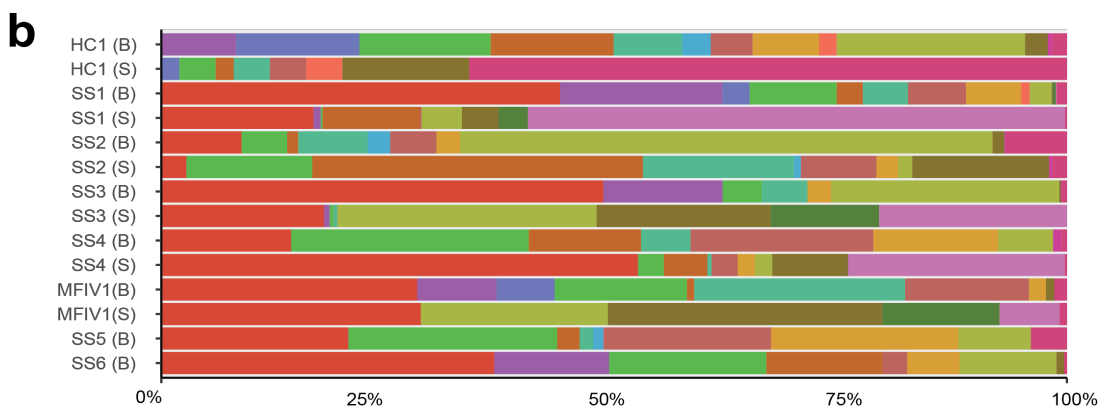

**Supplementary Figure 2: t-SNE plots of 7 CTCL patients and 1 healthy control. a**, t-SNE plots of single cells from PBMCs and skin dissociated tissue of a healthy control and 5 CTCL patients (SS1-MFIV1) and PBMCs only of 2 CTCL patients (SS5 and SS6) clustered by GEX and ADT multimodal WNN analysis. Different immune populations are colored and visualized based on their GEX and ADT profile (left). TCR  $\beta$  chain monoclonal cells are visualized (right) and colored by their tissue of distribution. Interestingly, one patient (SS2) had a mixture of malignant T cells expressing

$\beta$  chain CDR3 but one of two different TCR  $\alpha$  chain CDR3 sequences sharing the same TCR  $\alpha$  chain variable region gene. **b**, Bar plot showing distribution of populations in tissues of each donor. **M**: Malignant T cells, **T4N**: Naïve CD4<sup>+</sup> T cells, **T8N**: Naïve CD8<sup>+</sup> T cells, **T4M**: Memory CD4<sup>+</sup> T cells, **T8M**: Memory CD8<sup>+</sup> T cells, **T8E**: Effector CD8<sup>+</sup> T cells, **gdT**:  $\gamma/\delta$  T cells, **NK**: Natural killer cells, **BC**: B cells, **BCM**: Memory B cells, **MO**: Monocytes/macrophages, **DC**: Dendritic cells, **pDC**: plasmacytoid dendritic cells, **FB**: Fibroblasts, **KRT**: Keratinocytes, **APK**: Apoptotic keratinocytes, **UNC**: unclassified.

**a**

Clonotype Identity  
associated with top TCR $\beta$

**HC1**

TCR $\alpha$ : CAASWSPLGG SARQLTF  
TCR $\beta$ : CASSVGSPADTQYF  
(n = 92)

**b**

t-SNE of Top 5 Clonotypes  
Highlighted

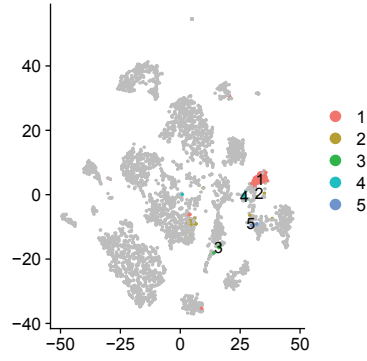**c**

Gene Expression Levels of  
CTCL Markers for Top 5 Clonotypes

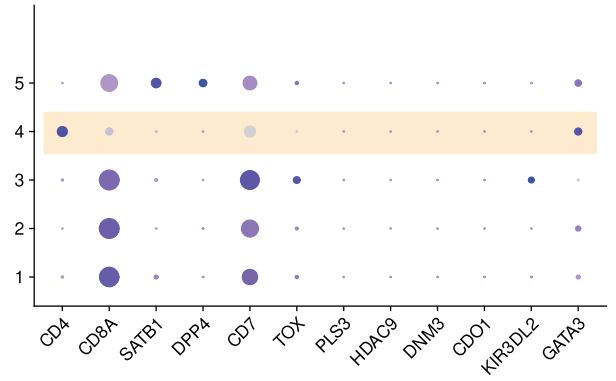**SS1**

TCR $\alpha$ : CAGSLYNFNKFYF  
TCR $\beta$ : CASSRQGGSGNTIYF  
(n = 1634)

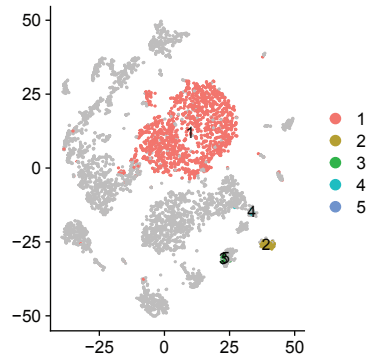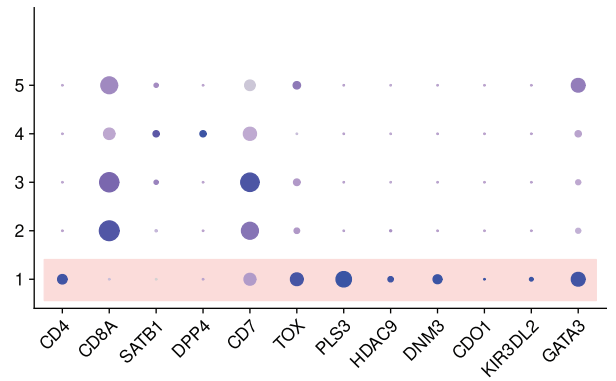**SS2**

TCR $\alpha$ : CALRKRGNTPLVF  
TCR $\beta$ : CASKLFMDREKGEAFF  
(n = 278)

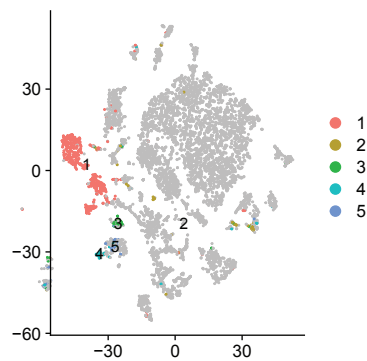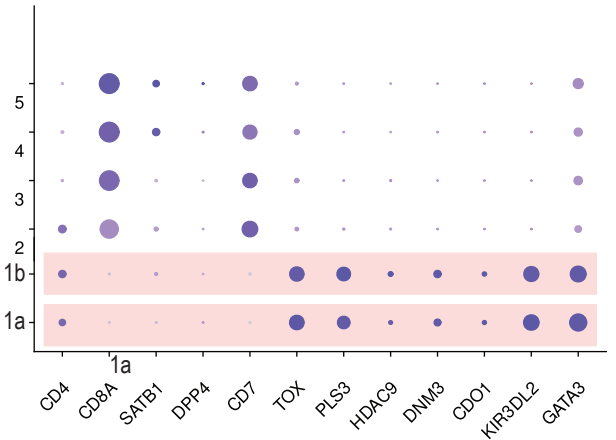**SS3**

TCR $\alpha$ : CAFPPGPNNAGNMLTF  
TCR $\beta$ : CASSTTGNTAEFF  
(n = 766)

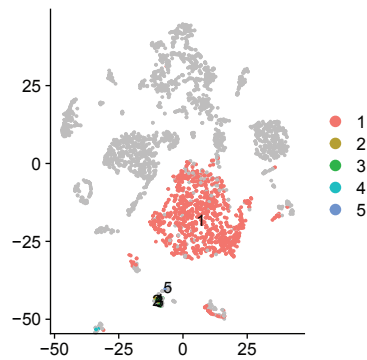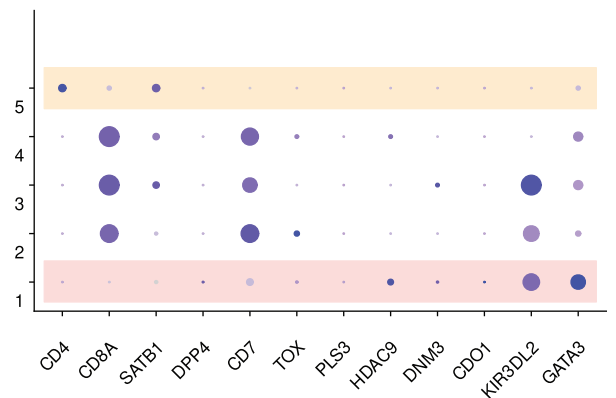



**Supplementary Figure 3: Definition of malignant clone in the skin and blood of a HC and CTCL patients (HC1-SS3) based on CDR3 identity and gene expression patterns.** **a,** Clonotype identities associated with the highest frequency TCR  $\beta$  CDR3 expressing T cells in donors HC1-SS3. **b,** GEX and ADT based t-SNE plots showing the top 5 clonotypes for each donor based on unique expression of TCR  $\beta$  CDR3s. Interestingly, patient SS2 possessed two clonotype identities in the highest frequency clonotype/malignant T cell cluster sharing an identical TCR  $\beta$  CDR3 but each one of two different TCR  $\alpha$  chain CDR3 sequences sharing the same TCR  $\alpha$  chain variable region gene (1a: CALRKRGNTPLVF, n = 278; and 1b: CHGSSNTGKLIF). **c,** Dot plots showing expression of CD4, CD8A, and common SS/CTCL markers used to identify malignant T cells across the top 5 clonotypes of each donor. The top clonotype/malignant clone in each patient is highlighted in pink shade, clonotypes consisting of CD4<sup>+</sup> T cells are highlighted in beige shade, and clonotypes consisting of CD8<sup>+</sup> T cells are unshaded.

**a**

Clonotype Identity  
associated with top TCR $\beta$

**SS4**

TCR $\alpha$ : CALVNAGNNRKLIV  
TCR $\beta$ : CASSRLGGAYNSPLHF  
(n = 211)

**b**

t-SNE of Top 5 Clonotypes  
Highlighted

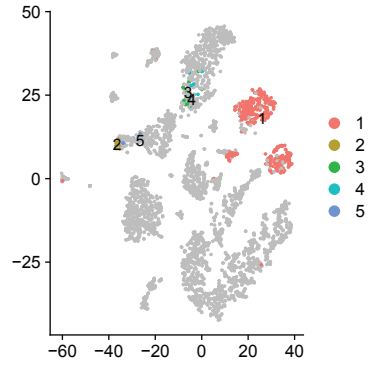**c**

Gene Expression Levels of  
CTCL Markers for Top 5 Clonotypes

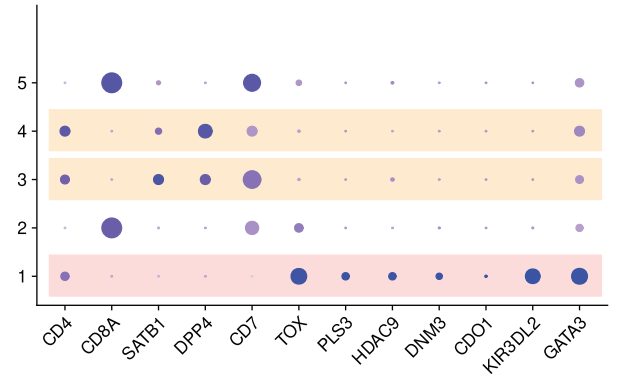**MFIV1**

TCR $\alpha$ : CAGQLRNAGGTSYGKLTIF  
TCR $\beta$ : CSARFLRGGYNEQFF  
(n = 564)

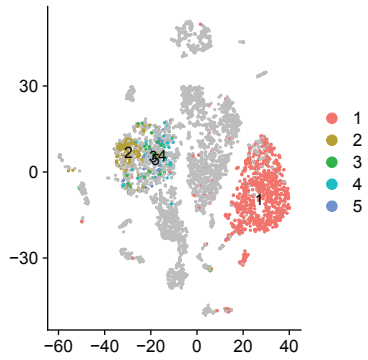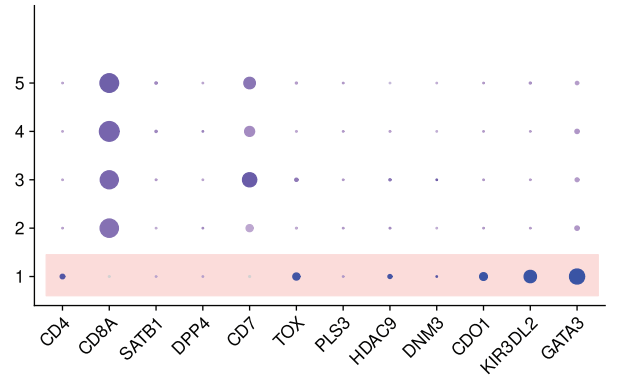**SS5**

TCR $\alpha$ : CAVRAPNTGGFKTIF  
TCR $\beta$ : CASSAGVGPYNEQFF  
(n = 702)

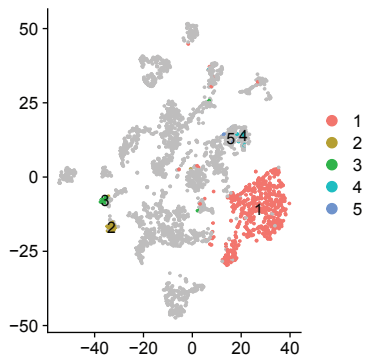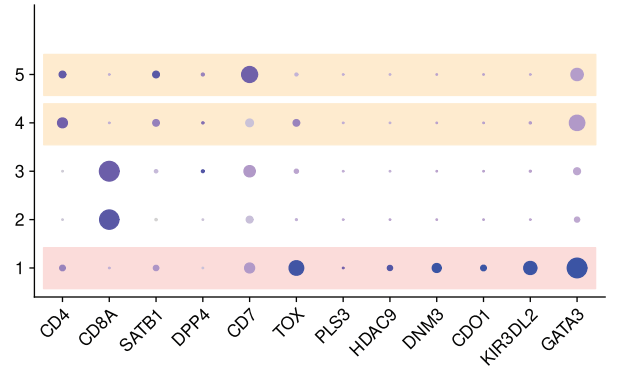**SS6**

TCR $\alpha$ : CAGKRDDKIIF  
TCR $\beta$ : CASRSQGSYNEQFF  
(n = 938)

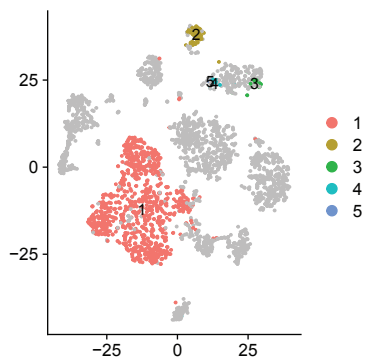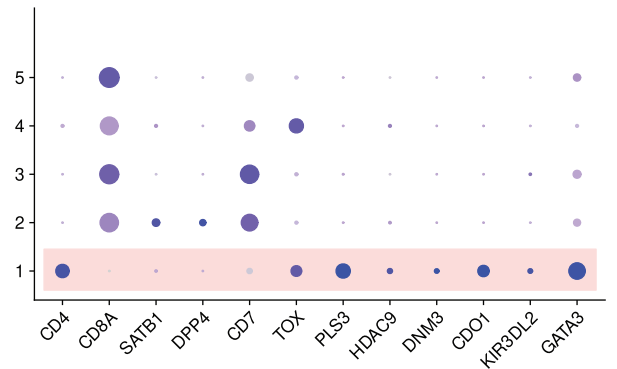

**Supplementary Figure 4: Definition of malignant clone in the skin and blood of CTCL patients (SS4-SS6) based on CDR3 identity and gene expression patterns.**

Clonotype identities associated with the highest frequency TCR  $\beta$  CDR3 expressing T cells in donors SS4-SS6. **b**, GEX and ADT based t-SNE plots showing the top 5 clonotypes for each donor based on unique expression of TCR  $\beta$  CDR3s. **c**, Dot plots showing expression of CD4, CD8A, and common SS/CTCL markers used to identify malignant T cells across the top 5 clonotypes of each donor. The top clonotype/malignant clone in each patient is highlighted in pink shade, clonotypes consisting of CD4<sup>+</sup> T cells are highlighted in beige shade, and clonotypes consisting of CD8<sup>+</sup> T cells are unshaded.

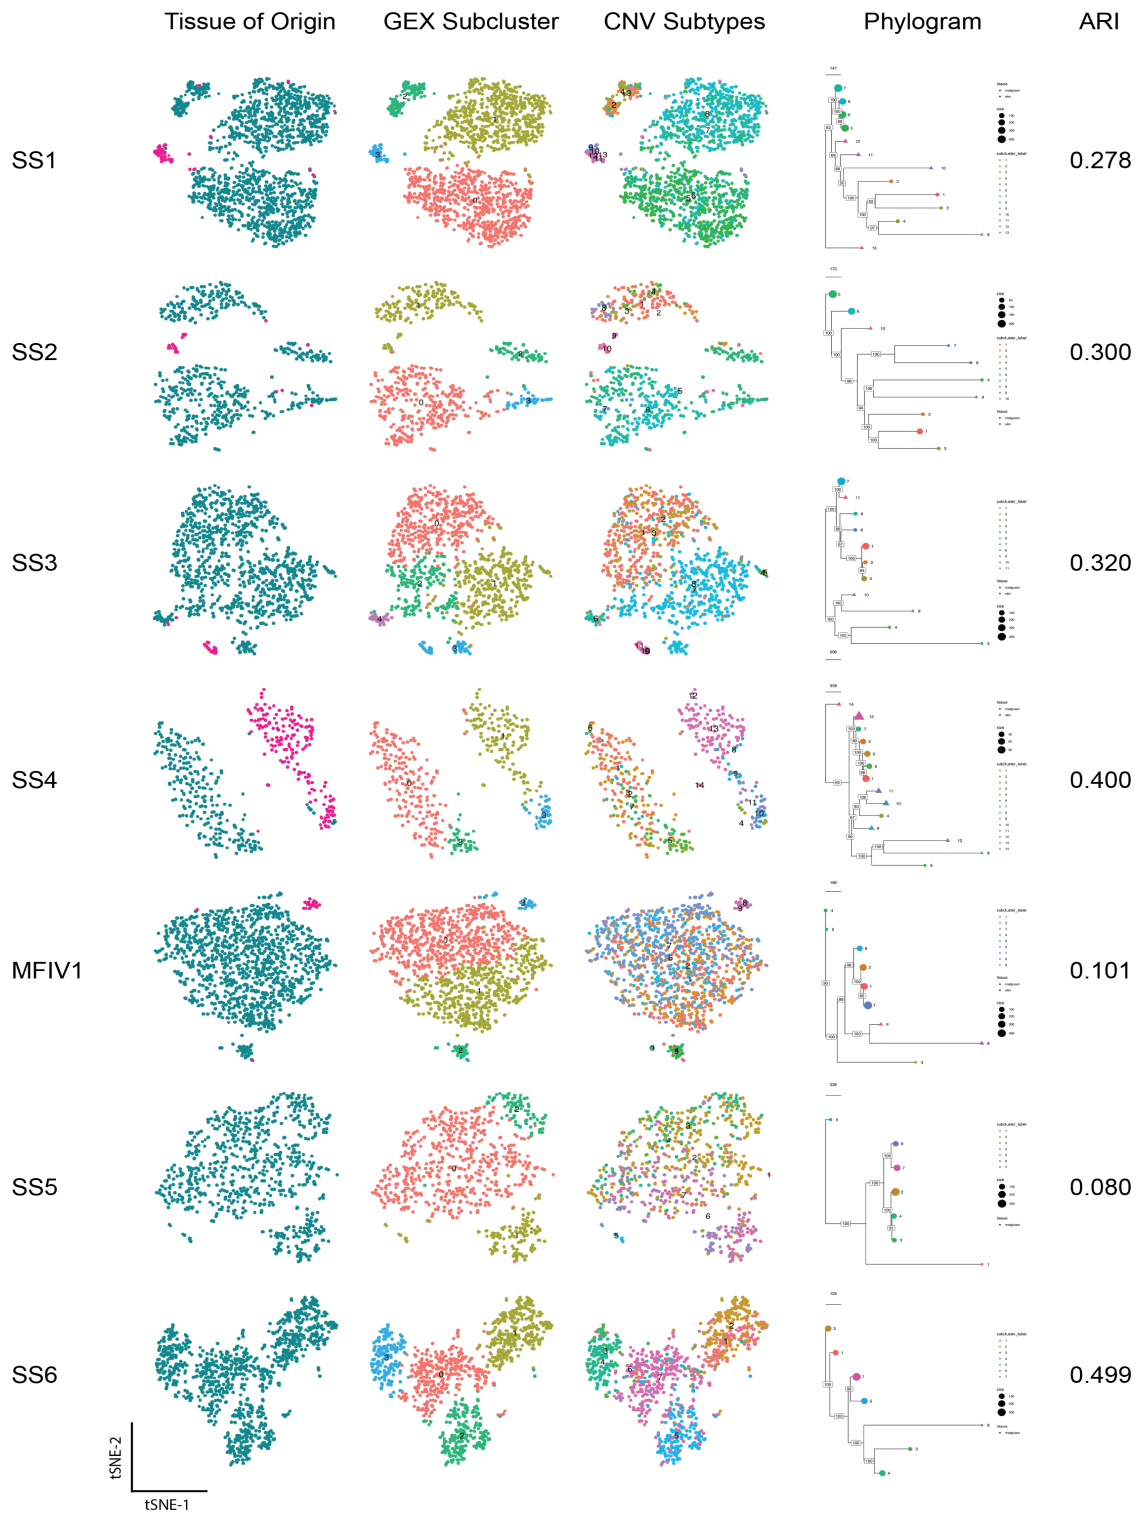

**Supplementary Figure 5: Concordance between GEX sub-cluster groupings and inferred CNV sub-clonal groupings of patient derived malignant T cells.** Malignant T cells from skin and blood of five CTCL patients (SS1-MFIV1) and blood only of two CTCL patients

(SS6 and SS7) are clustered by GEX and visualized by tissue of origin, GEX sub-clusters and CNV sub-clones (left to right). Phylograms of malignant T cells from each patient bootstrapped 100 times and rooted using their non-malignant polyclonal T cells show malignant evolution of CNV defined clusters. The Adjusted Rand Index (ARI) is used to determine cluster alignment between GEX-defined sub-clusters and CNV-defined sub-clones.

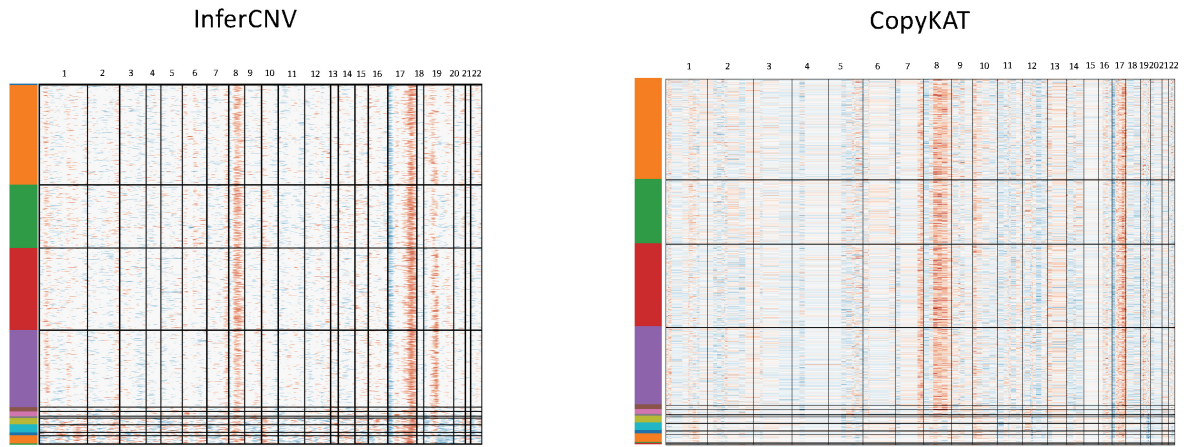

**Supplementary Figure 6. CNV profiling of blood-derived malignant T cells from an SS patient using InferCNV and CopyKAT.** Plots showing gain (in red) and loss (in blue) inferred genomic events in a patient with maximal transcriptional heterogeneity (SS1). Subclonal populations are colored by CNV profiling. CNV events in chromosomes, labeled from left to right (1-22), are largely recapitulated between InferCNV and CopyKAT, an alternative method of CNV profiling from scRNA-seq data.<sup>2</sup>

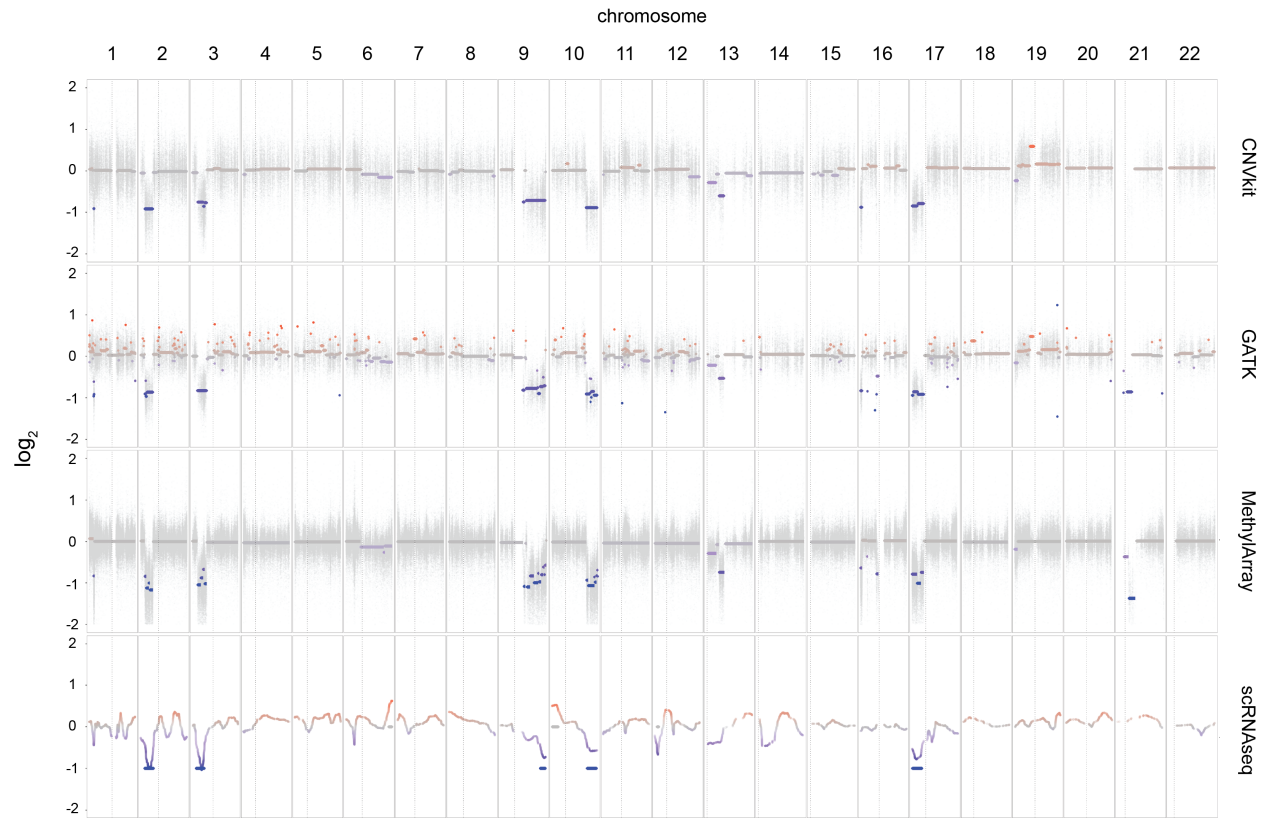

**Supplementary Figure 7: Validation of inferred CNVs from scRNA-seq using whole exome sequencing and methylation microarray.** Plots showing gain (in red) and loss (in blue) events in malignant T cells from the blood of a CTCL patient (independent SS patient) from whole exome sequencing and scRNA-seq. Two methods of analysis from whole exome sequencing (top 2 rows) and one from methylation microarray analysis (3<sup>rd</sup> row) were used to compare to inferred CNV analysis from scRNA-seq (bottom row) on the same patient.

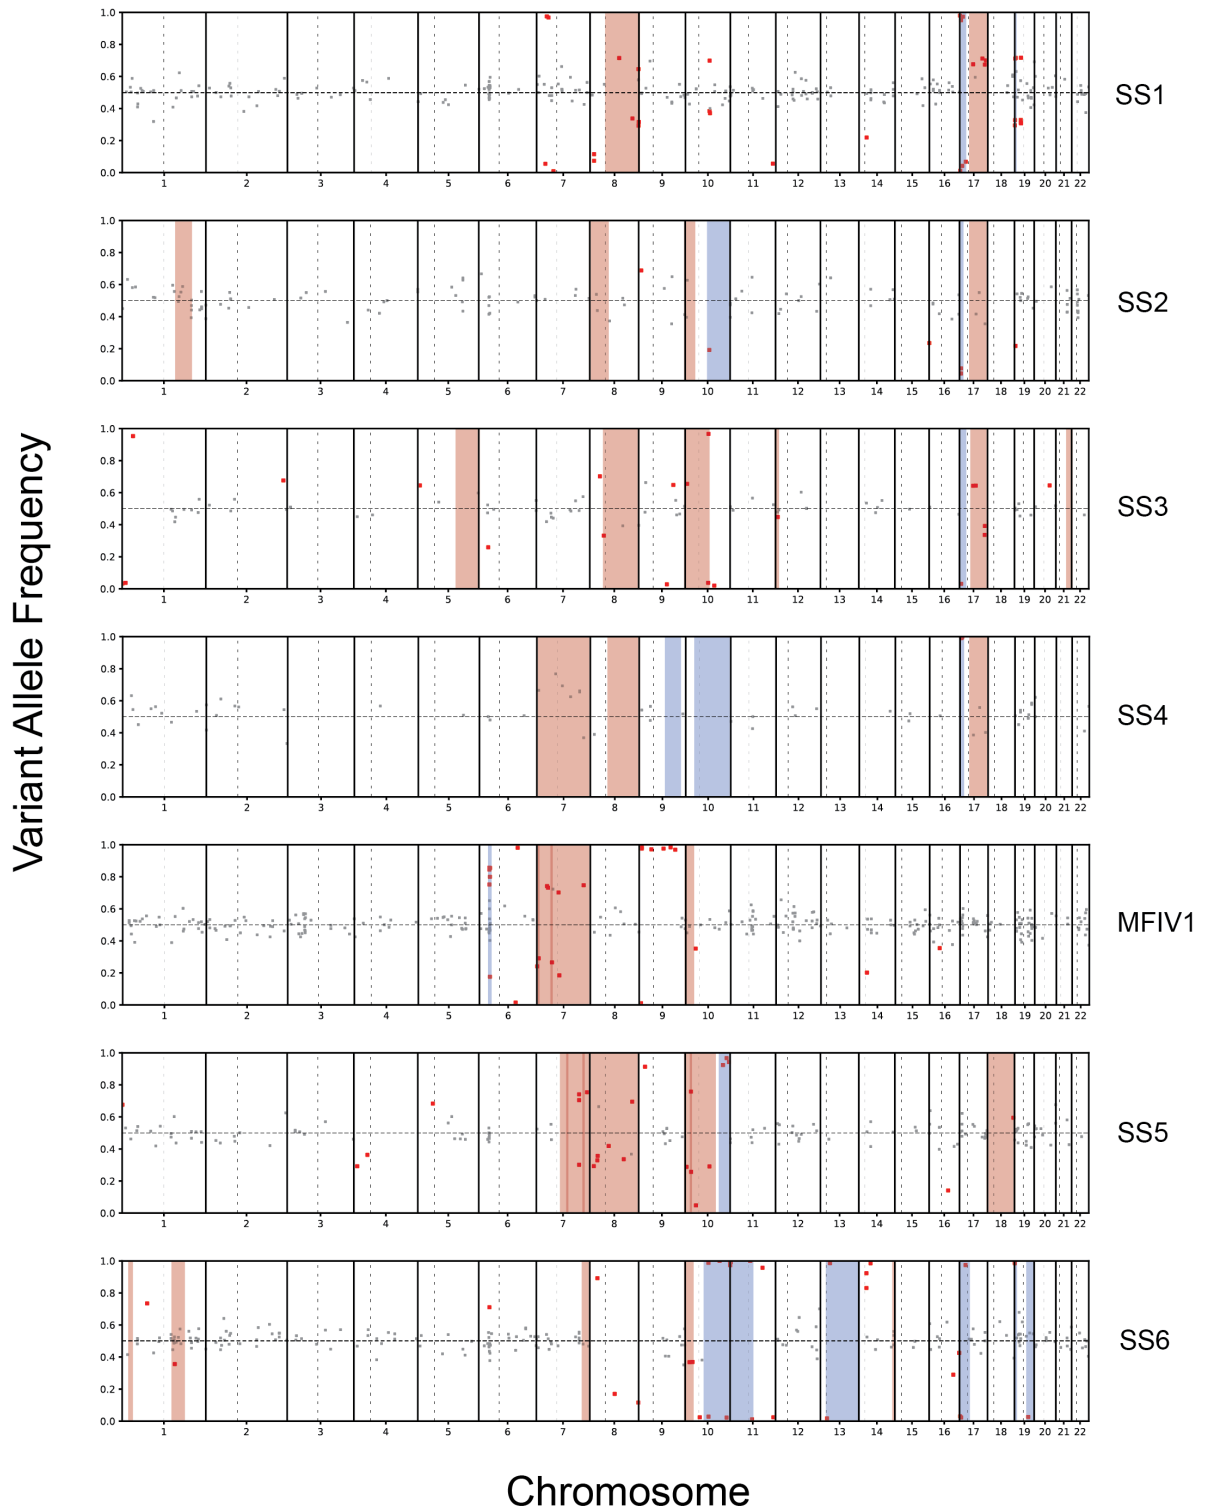

**Supplementary Figure 8: Validation of inferred CNVs using germline SNVs**

**common between normal and malignant cells. During LOH or insertion events, variant allele**



frequencies of common heterozygous SNVs deviate from their expected allele frequencies. A Manhattan plot of  $-\log_{10}$  transformed  $p$ -values depict SNVs that reject the null hypothesis (red points) generally overlap scRNA-seq inferred CNVs: insertion (red) or deletion (blue). Variant allele frequency ( $N, k$ ) are tested against a heterozygous null model ( $P_{\text{success}} = 0.5$ , Binomial distribution). Genome-wide significance threshold is set at  $p < 5.0 \times 10^{-8}$ .

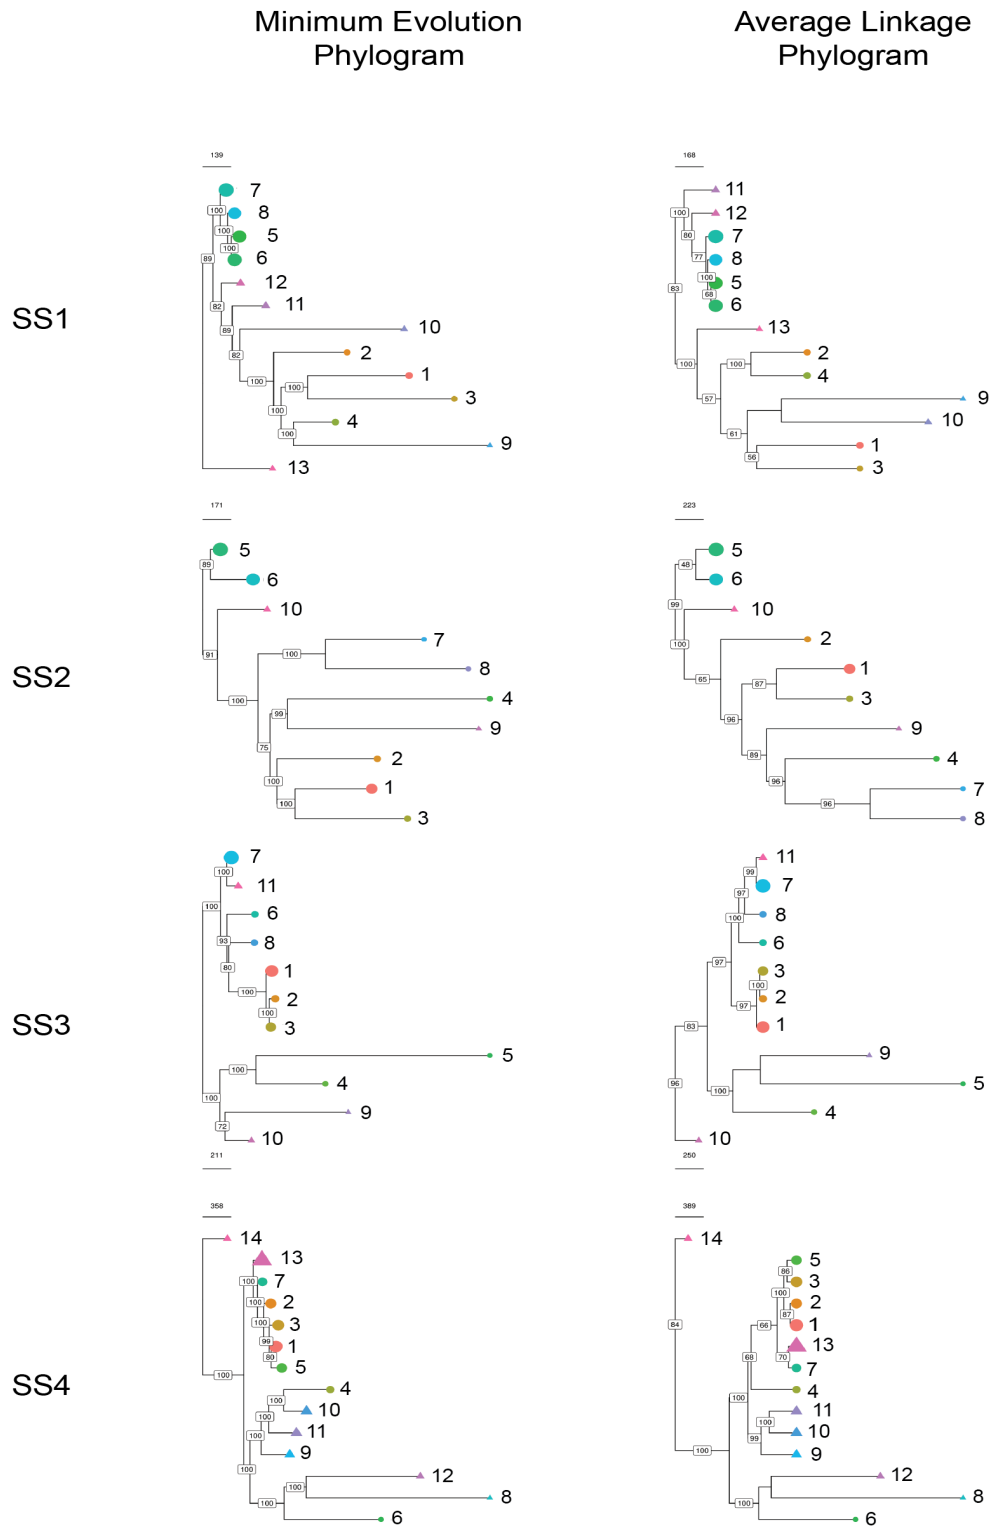

**Supplementary Figure 9. Comparison of different phylogram building methods on patient skin- and blood-derived malignant T cells. Phylograms of malignant T cells from each**

CTCL patient (SS1-SS4) rooted using their non-malignant polyclonal T cells show malignant evolution of CNV defined clusters across multiple platforms.

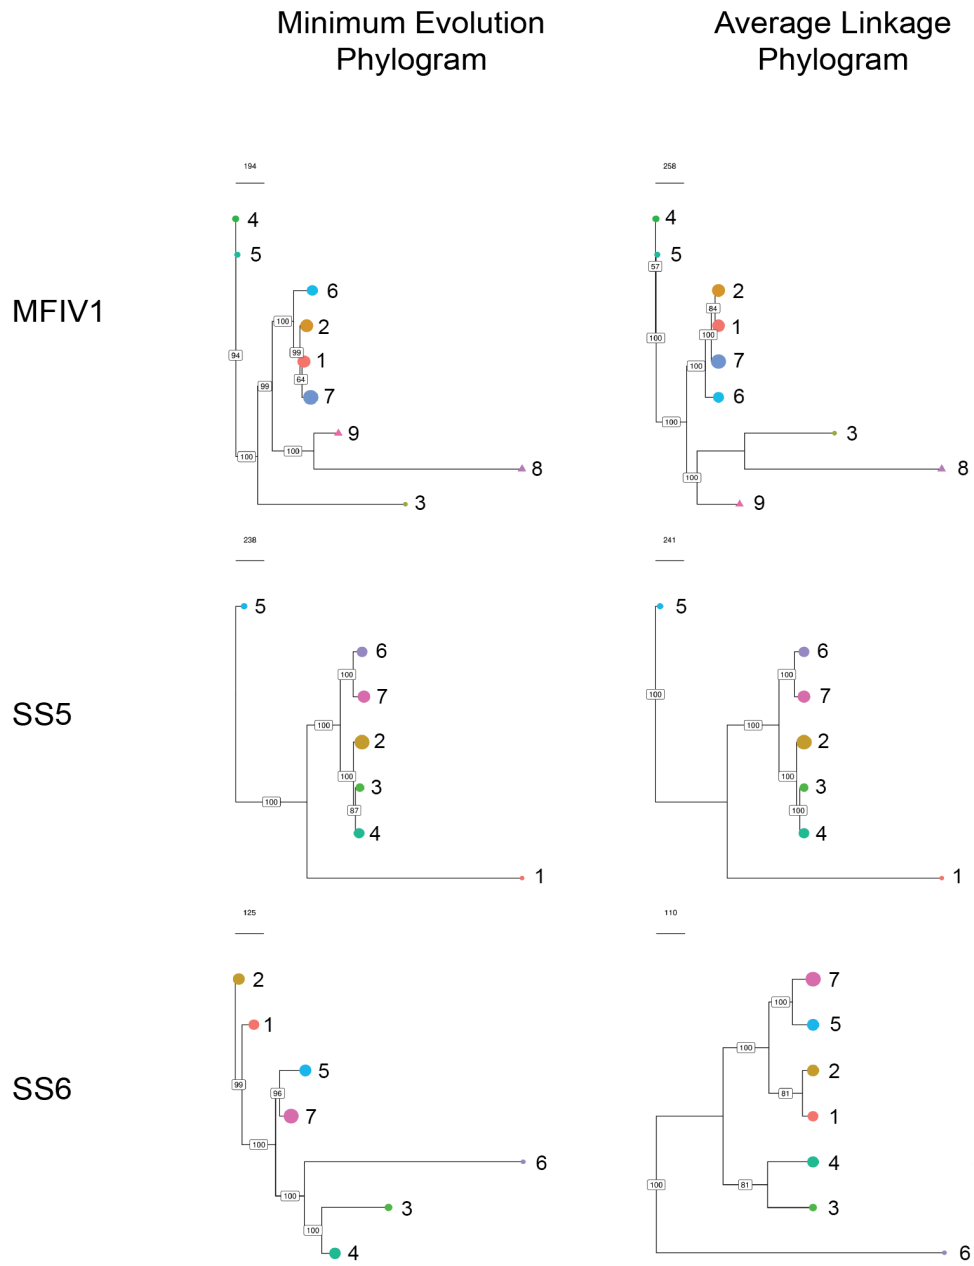

**Supplementary Figure 10. Comparison of different phylogram building methods on patient skin- and blood derived malignant T cells.** Phylograms of malignant T cells from each CTCL patient (MFIV1-SS6) rooted using their non-malignant polyclonal T cells show malignant evolution of CNV defined clusters across multiple platforms.

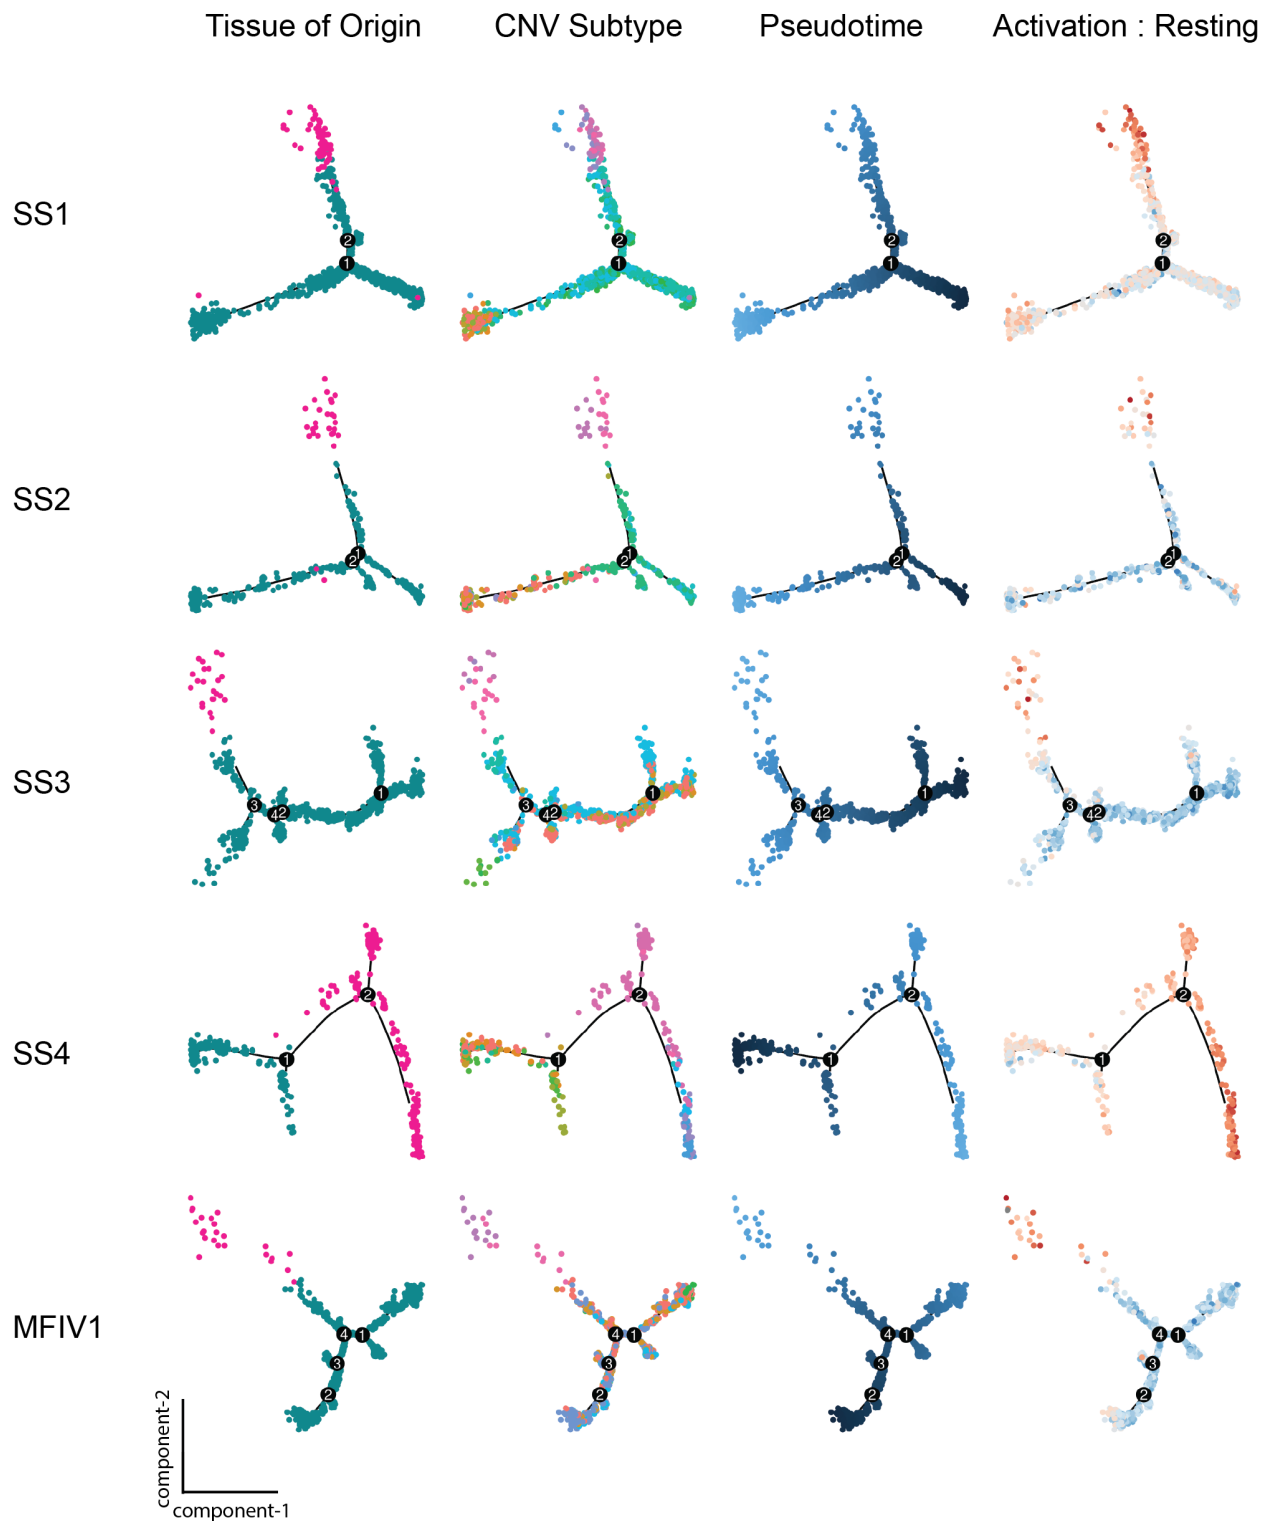

**Supplementary Figure 11: Pseudotime transcriptional trajectories of malignant T cells from skin and blood of CTCL patients.** Monocle-2 transcriptional trajectory analysis of

malignant T cells from the skin and blood of five CTCL patients (SS1-MFIV1) visualized based on tissue of origin, CNV-defined sub-clones, pseudotime values (earliest to latest in transcriptional projection) and activation to resting gene set ratio score. Rooting of pseudotime trajectories was set based on the CNV clones that had the shortest branch length in the phylograms.

**a**

Malignant (Blood)  
vs  
Malignant (Skin)

By Individual

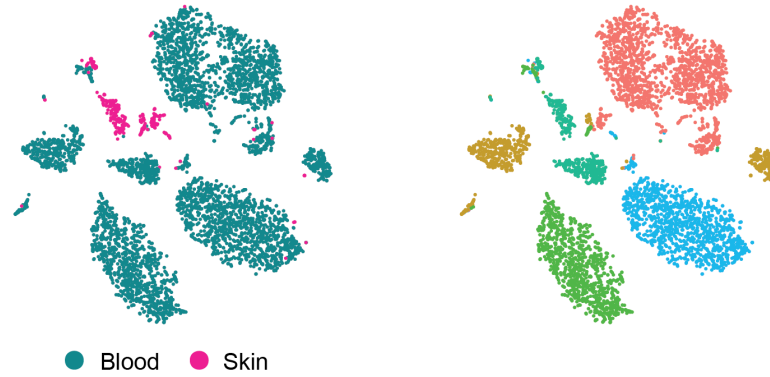**b**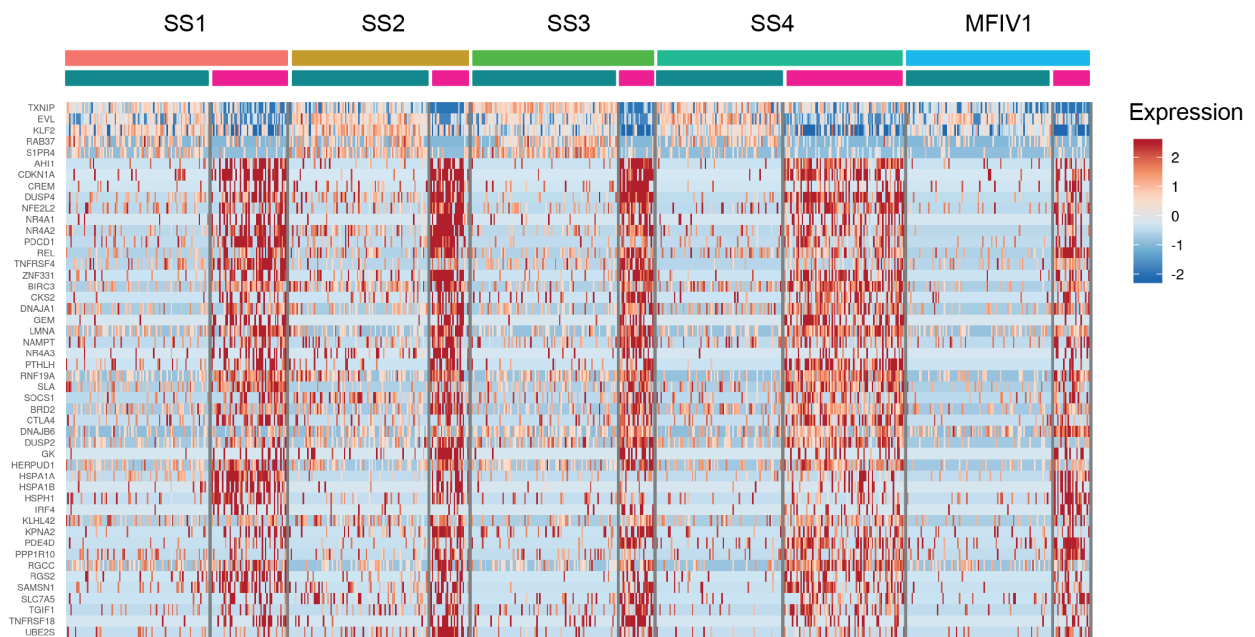

**Supplementary Figure 12: Differential gene expression comparisons of paired skin- and blood-derived malignant T cells. a,** t-SNE of all skin- and blood-derived malignant T cells colored by their tissue of origin (left) or individual (right) **b,** Paired comparisons between skin and blood derived malignant T cells were done independently for each of the five CTCL patients. A list of differentially expressed genes (adj p-val < 0.05,  $|\log_2FC| \geq 1$ ) common between at least

two out of five CTCL patients was used. To mitigate over-plotting because of the blood-skin imbalance, a maximum of 100 cells from each sample was sampled out, and then ordered by patient ID to plot the heatmap.



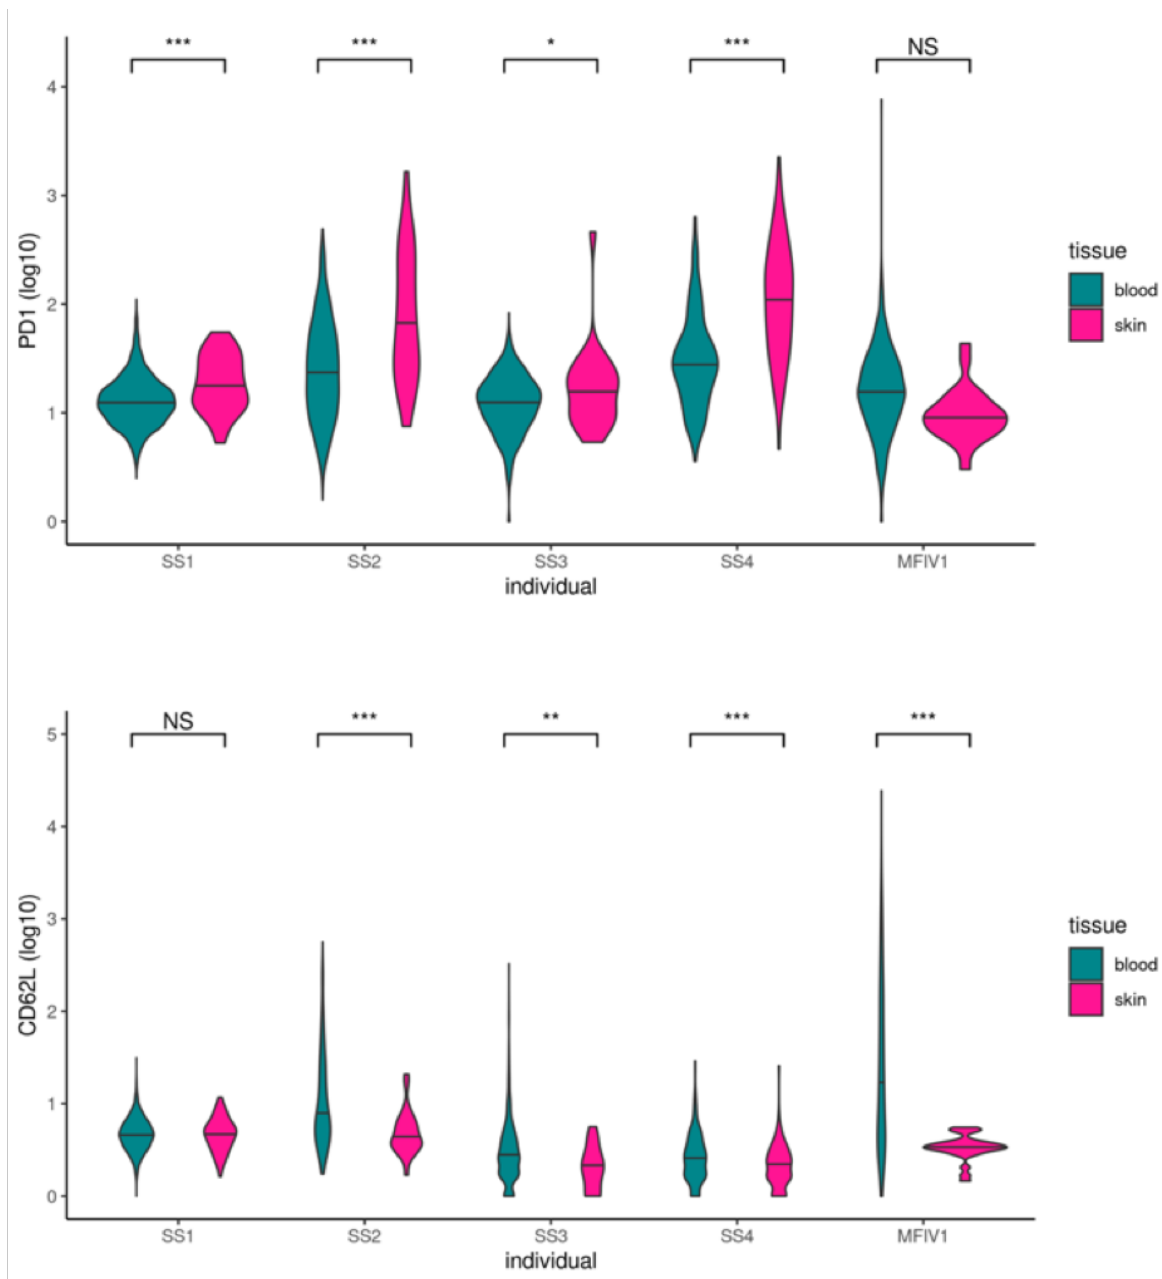

**Supplementary Figure 13: Levels of surface PD-1 and CD62L expression in malignant T cells from the skin and blood of 5 CTCL patients.** Violin plots showing differences in the expression of surface markers PD-1 (top) and CD62L (bottom) from skin- and blood-derived malignant T cells of five CTCL patients. Welch's two-sample t-test was used. Solid lines represent the median values and statistical significance is represented as: not significant (NS) =  $p > 0.05$ , \* =  $p < 0.05$ , \*\* =  $p < 0.01$  and \*\*\* =  $p < 0.001$ .

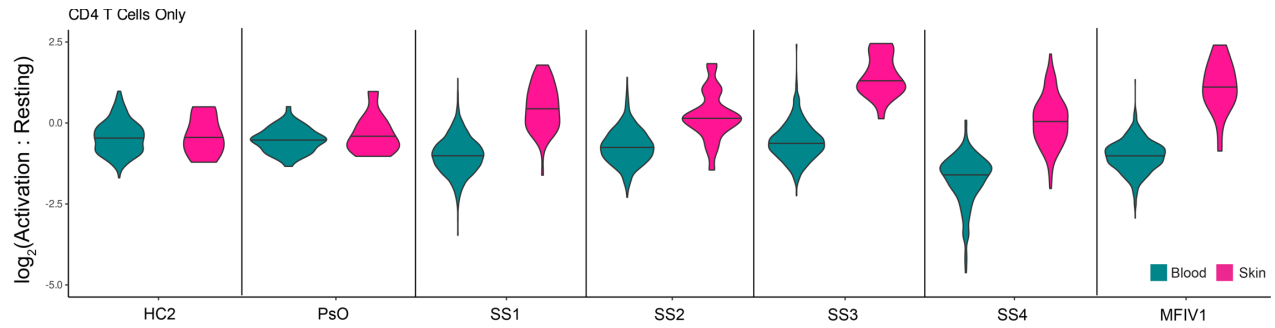

**Supplementary Figure 14: Validation of enriched activation to resting transcriptional signature score ratio in skin derived T cells from CTCL patients.** We compared the activation to resting score ratios in CD4<sup>+</sup> T cells from the lesional skin and blood of 4 patients with SS and one MF stage IV patient to those from the non-lesional skin and blood of a psoriasis patient and a healthy control. Skin dissociated cells and peripheral blood PBMCs were isolated, banked and thawed identically before the ECCITE-seq protocol was run in all the samples shown.

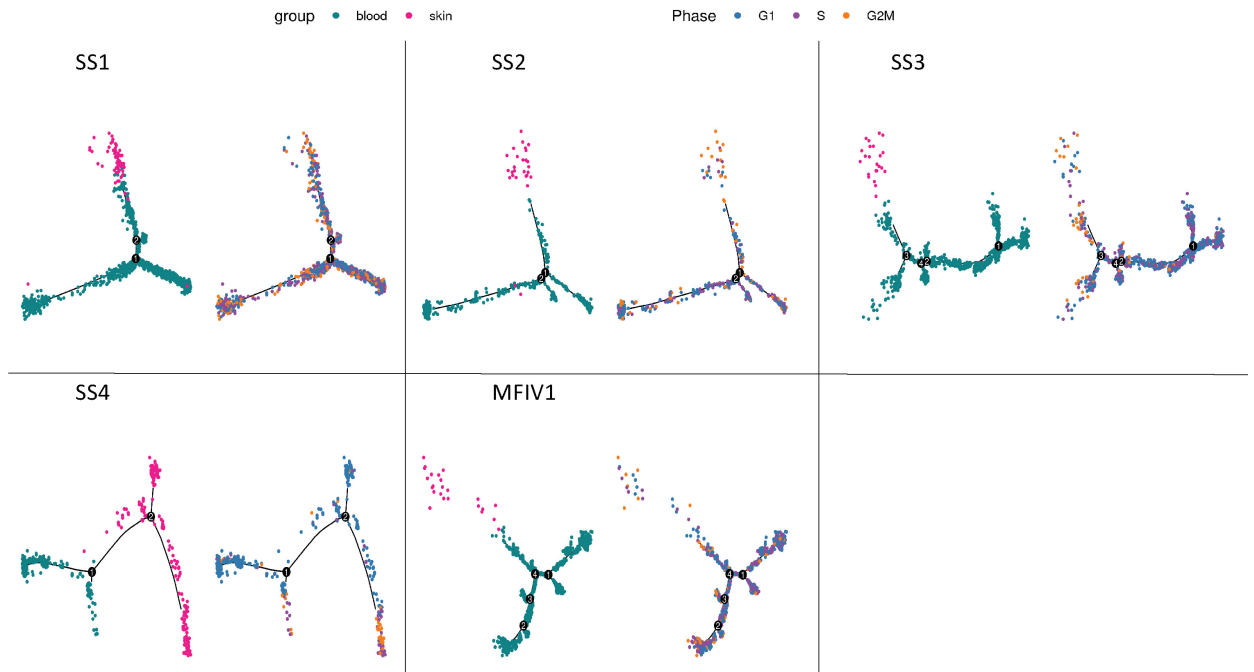

**Supplementary Figure 15. Cell cycle phase analysis of malignant T cells from the skin and blood of CTCL patients.** Transcriptional trajectories of skin- and blood-derived malignant T cells from five CTCL patients colored by tissue identity (left) and cell cycle phase scoring (right). Highly proliferative malignant T cells are highlighted in orange and assigned as “G2M” (G/M phases) cells.

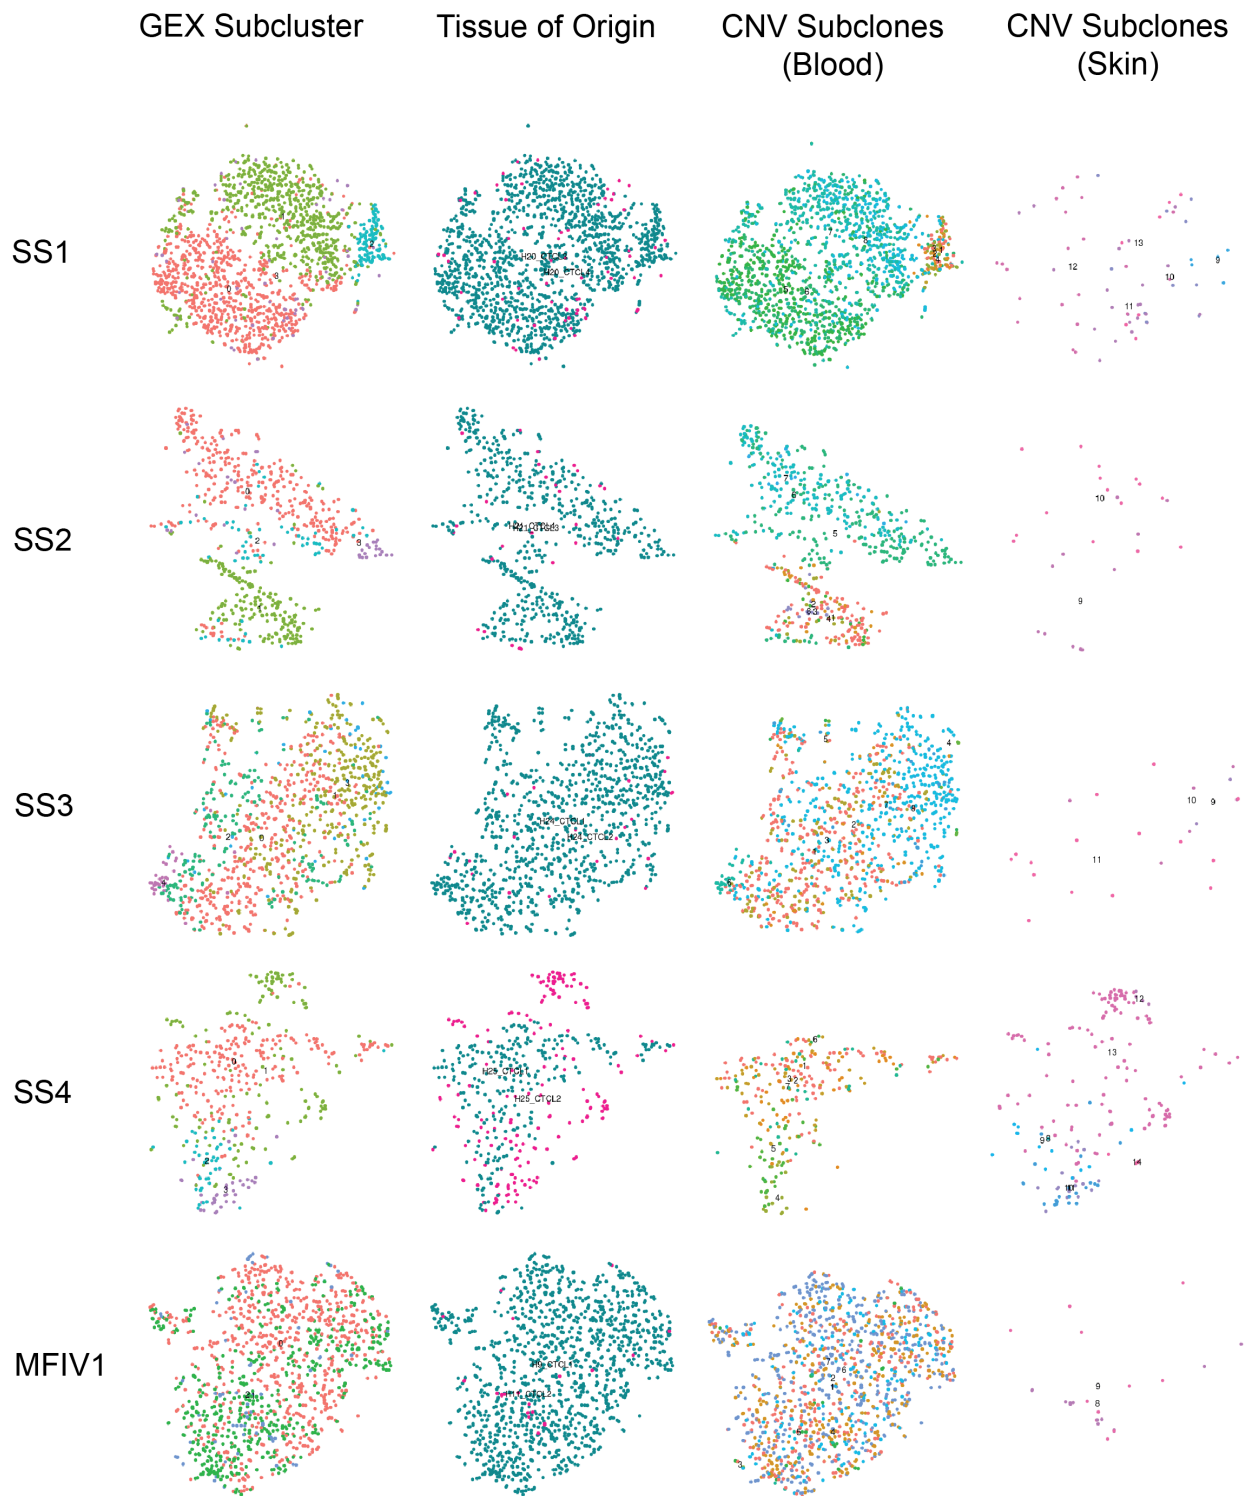

**Supplementary Figure 16: Regression of tissue-based transcriptional differences between skin- and blood-derived malignant T cells. GEX-based t-SNE plots after regression**

of tissue-based transcriptional differences between malignant T cells allows skin-derived malignant T cells to re-cluster heterogeneously (1<sup>st</sup> and 2<sup>nd</sup> columns; left to right). This reveals the approximate position of skin-derived malignant T cells relative to the blood-derived malignant T cell CNV sub-clones in columns 3 and 4 (left to right).

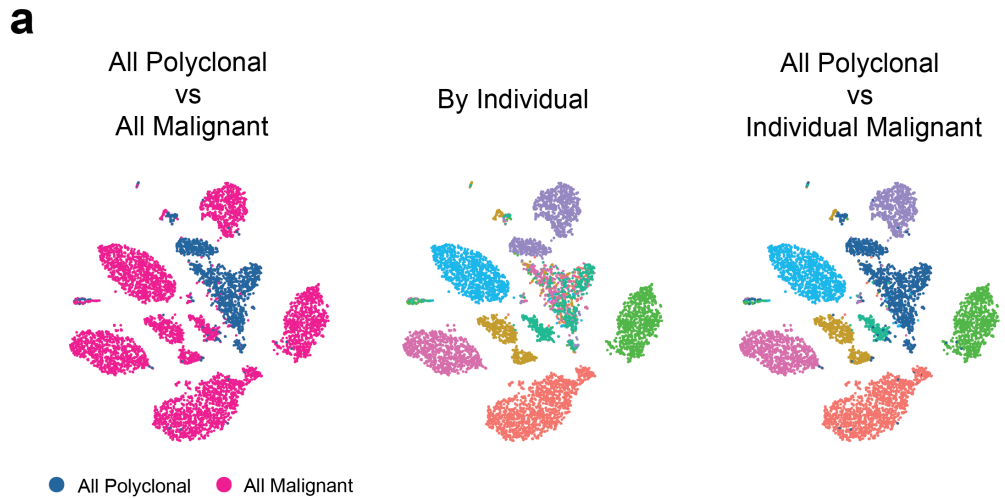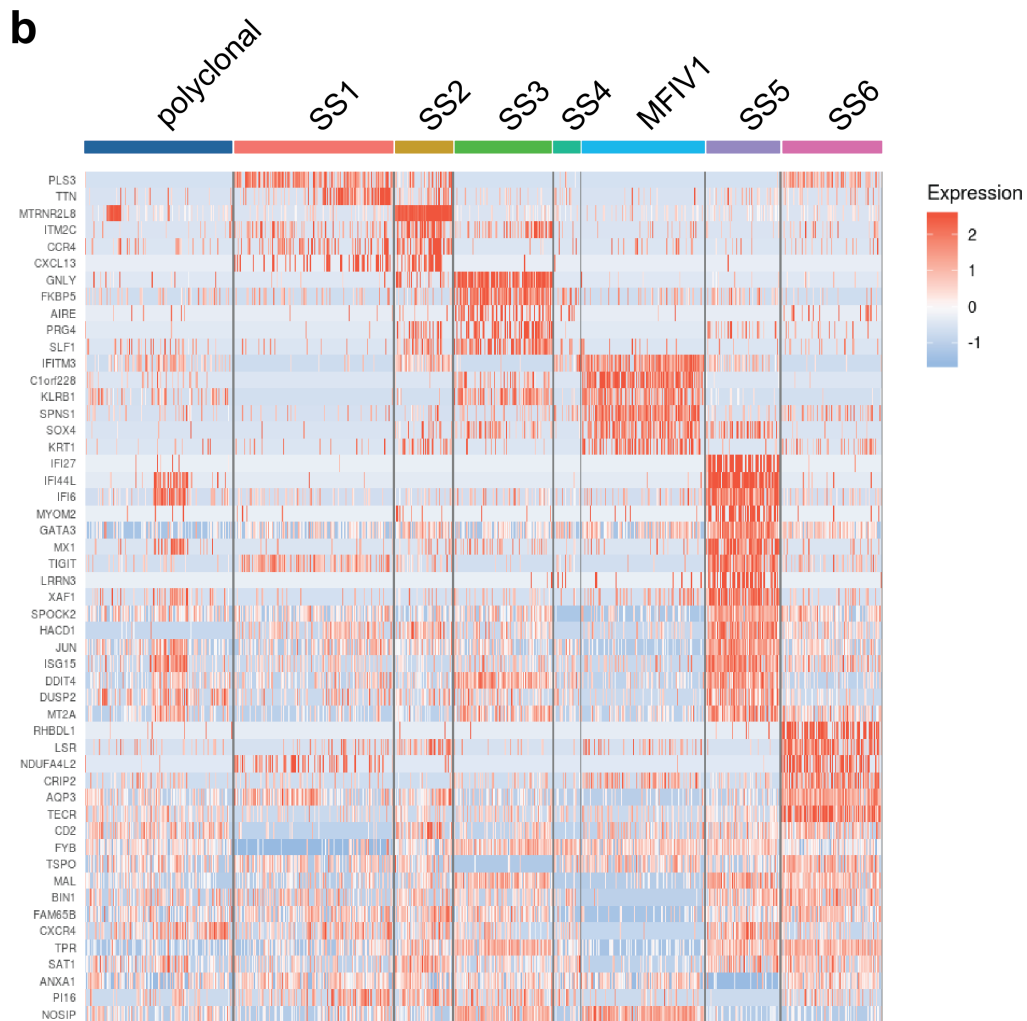

**Supplementary Figure 17: Differential gene expression analysis between malignant**

**T cells from CTCL patients. a, t-SNE plots of all blood-derived CD4+ polyclonal and**

malignant T cells from seven CTCL patients clustered based on GEX. The plots are colored by presence of malignant clonality (left), by individual patient ID (middle) and by individual patient malignant clonality (right). **b**, Heatmap showing differentially expressed genes among malignant T cells from the circulation of seven CTCL patients as well as polyclonal CD4<sup>+</sup> and CD45RO<sup>+</sup> (memory) T cells from each patient and a healthy control.

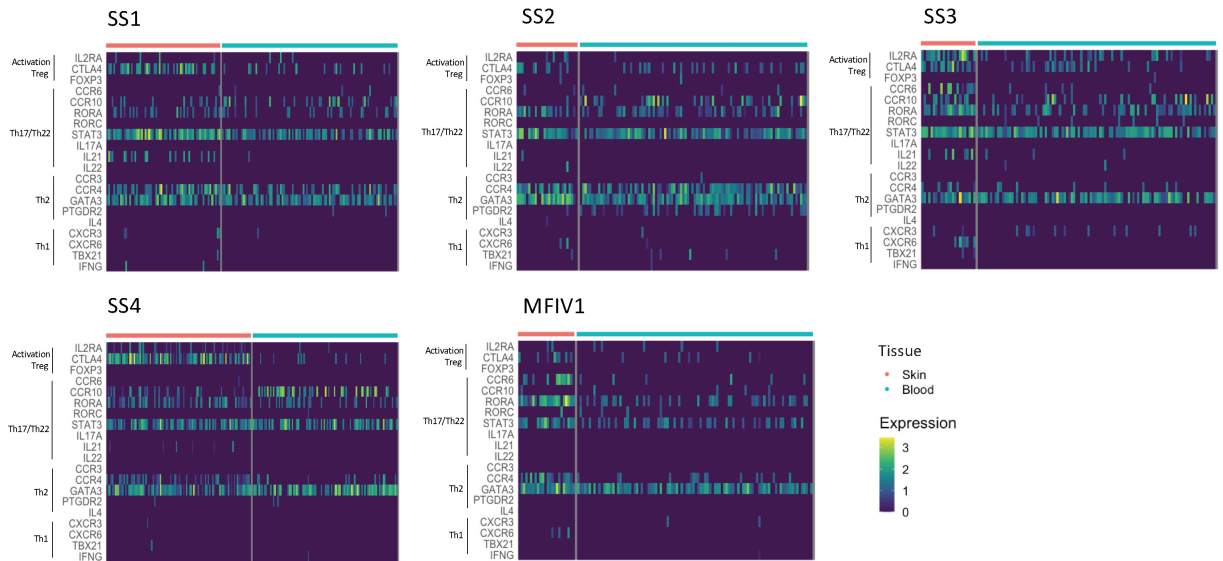

**Supplementary Figure 18. Expression of characteristic T-regulatory and T-helper subtype transcripts in malignant T cells from the skin and blood of CTCL patients.**

Heatmaps showing gene expression of selected transcripts (surfaces markers, transcription factors, and cytokines) associated with differentiation status of CD4<sup>+</sup> T cells in the skin (red) and blood (blue) of five CTCL patients.



## Supplementary references

1. Talevich E, Shain AH, Botton T, Bastian BC. CNVkit: Genome-Wide Copy Number Detection and Visualization from Targeted DNA Sequencing. *PLoS Comput Biol.* 2016;12(4):e1004873.
2. Gao R, Bai S, Henderson YC, et al. Delineating copy number and clonal substructure in human tumors from single-cell transcriptomes. *Nat Biotechnol.* 2021.
3. Tirosh I, Izar B, Prakadan SM, et al. Dissecting the multicellular ecosystem of metastatic melanoma by single-cell RNA-seq. *Science.* 2016;352(6282):189-196.
4. Qiu X, Mao Q, Tang Y, et al. Reversed graph embedding resolves complex single-cell trajectories. *Nat Methods.* 2017;14(10):979-982.
